1 **Native CRISPR-Cas mediated in situ genome editing reveals extensive resistance synergy**  
2 **in the clinical multidrug resistant *Pseudomonas aeruginosa***

3

4 Zeling Xu,<sup>a</sup> Ming Li,<sup>b</sup> Yanran Li,<sup>a</sup> Huiluo Cao,<sup>b\*</sup> Hua Xiang,<sup>b#</sup> Aixin Yan<sup>a#</sup>

5

6 <sup>a</sup>School of Biological Sciences, The University of Hong Kong, Hong Kong SAR, China

7 <sup>b</sup>State Key Laboratory of Microbial Resources, Institute of Microbiology, Chinese Academy of  
8 Sciences, Beijing, China

9

10 Running head: Harnessing CRISPR to tackle antibiotic resistance

11

12 #Address correspondence to Hua Xiang, [xiangh@im.ac.cn](mailto:xiangh@im.ac.cn) or Aixin Yan, [ayan8@hku.hk](mailto:ayan8@hku.hk)

13 \*Present address: Department of Microbiology, Li Ka Shing Faculty of Medicine, The  
14 University of Hong Kong, Hong Kong SAR, China.

15

16 Z.X. and M.L. contributed equally to this work.

17

18 Word counts: abstract (250); text (5157)

19

20 **ABSTRACT**

21 Antimicrobial resistance (AMR) is imposing a global public health threat. Despite its importance,  
22 characterizing drug resistance directly in the clinical isolates of resistant pathogens is frequently  
23 hindered by the lack of genome editing tools in these “non-model” strains. *Pseudomonas*  
24 *aeruginosa* is both a prototypical multidrug resistant (MDR) pathogen and a model species for  
25 CRISPR-Cas research. In this study, we report the successful development of a simple and efficient  
26 one-plasmid mediated, one-step genome editing approach in a paradigmatic MDR strain  
27 PA154197 by exploiting its native type I-F CRISPR-Cas system. The technique is readily  
28 applicable in two additional type I-F CRISPR-containing, clinical and environmental *P.*  
29 *aeruginosa* isolates. A two-step In-Del strategy involving insertion and subsequent deletion of a  
30 tag nearby the desired editing site is further developed to edit the genomic locus lacking an  
31 effective PAM (protospacer adjacent motif) or within an essential gene, which principally allows  
32 any non-lethal genomic manipulation in the strains. With these powerful techniques, the resistant  
33 determinants of PA154197 were delineated in its native genetic background. Moreover, relative  
34 contributions and extensive synergy of different resistance determinants previously unrecognized  
35 by using laboratory strains were disclosed. The two efflux pumps with different substrate  
36 preference, MexAB-OprM and MexEF-OprN, synergistically expel fluoroquinolones,  
37 trimethoprim and chloramphenicol. Among the three resistant mutations synergizing  
38 fluoroquinolones resistance, *gyrA* mutations elicit a greater resistance than drug efflux by MexAB-  
39 OprM or MexEF-OprN. These results advanced our understanding of the MDR development of  
40 clinical *P. aeruginosa* strains and demonstrated the great potentials of native CRISPR systems in  
41 AMR research.

42

## 43 **IMPORTANCE**

44 Genome editing and manipulation often revolutionizes the understanding, exploitation, and control  
45 of microbial species. Despite the presence of well-established genetic manipulation tools in various  
46 model strains, their applicability in the medically, environmentally, and industrially significant,  
47 “non-model” strains is often hampered owing to the vast diversity of DNA homeostasis in these  
48 strains and the cytotoxicity of the heterologous CRISPR-Cas9/Cpf1 system. Harnessing the native  
49 CRISPR-Cas systems broadly distributed in prokaryotes with built-in genome targeting activity  
50 presents a promising and effective approach to resolve these obstacles. We explored and exploited  
51 this methodology in the prototypical multidrug resistant pathogen *P. aeruginosa* by exploiting the  
52 most common subtype of the native CRISPR systems in the species. Our successful development  
53 of the first type I-F CRISPR-mediated genome editing technique and its subsequent extension to  
54 additional clinical and environmental *P. aeruginosa* isolates opened a new avenue to the functional  
55 genomics of antimicrobial resistance in pathogens.

56

57 **KEYWORDS:** Multidrug resistance, *Pseudomonas aeruginosa*, Native CRISPR-Cas system,  
58 Multidrug efflux pump, Resistance synergy

## 59 **INTRODUCTION**

60 Antimicrobial resistance (AMR) is imposing an alarming threat to the global public health. Of  
61 particular challenging in clinics are those “ESKAPE” pathogens which are extraordinary to  
62 engender antibiotic resistance, i.e. *Enterococcus spp.*, *Staphylococcus aureus*, *Klebsiella spp.*,  
63 *Acinetobacter baumannii*, *Pseudomonas aeruginosa*, and *Enterobacter spp.*. Owing to its intrinsic  
64 resistance to a variety of antimicrobials and the enormous capacity of developing acquired

65 resistance during antibiotics chemotherapies, *Pseudomonas aeruginosa* is recognized as the  
66 prototypical multidrug resistant (MDR) pathogen (1-4). Remarkably, in recent years, international  
67 high-risk clones of MDR *P. aeruginosa* have emerged and have been shown to cause worldwide  
68 outbreaks (5). Genetic analyses reveal that these clones often contain a complex set of resistance  
69 markers (6-8) including both the genetic variations that lead to resistance to specific classes of  
70 antibiotics, such as mutations in drug targets and acquisition of drug inactivation enzymes, and  
71 those conferring simultaneous resistance to multiple drugs, such as over-expression of multidrug  
72 efflux pumps. However, whether the genetic mutations identified by comparative genomics indeed  
73 contribute to the resistance phenotypes remains to be verified in the native genetic backgrounds of  
74 the strains. Furthermore, the relative contributions and the interplay of the different resistance  
75 determinants in shaping the MDR profile of the clinically significant resistant pathogens remain  
76 largely elusive.

77 Current knowledge of the resistance determinants and their mechanisms are obtained largely by  
78 reconstitution of the identified genetic variations or over-expressing multidrug efflux pumps in  
79 laboratory model strains (9, 10). Several studies indicated that no obvious multiplicative or  
80 synergetic effects were observed between over-expression of multidrug efflux pumps and the  
81 mechanisms causing resistance to specific classes of antibiotics, such as over-expression of the  
82 cephalosporinase AmpC and mutations in the DNA gyrase GyrA or topoisomerase IV ParC (11-  
83 14). It was proposed that synergistic interactions occur when different types of multidrug efflux  
84 systems operate simultaneously, i.e. the tripartite resistance-nodulation-division (RND) efflux  
85 pumps and the single component pump (e.g. TetA/C) (15). However, it is increasingly recognized  
86 that the genetic background of the resistant strains and epistasis among different resistant  
87 mutations play an important role in shaping the resistance profile of the clinical strains (16-18).

88 Hence, it is necessary to verify the functions of identified resistant mutations in the native genetic  
89 background of the clinical MDR strains. The major obstacle of these molecular characterizations  
90 is the lack of efficient and readily applicable genomic editing tools in these “non-model” strains.  
91 In addition to be a prototypical MDR pathogen, *P. aeruginosa* is an important model system for  
92 CRISPR-Cas research, especially the type I CRISPR-Cas system. Phylogenetic analysis revealed  
93 that CRISPR-Cas systems are widely distributed in global AMR *P. aeruginosa* isolates with more  
94 than 90% belonging to the I-E or I-F subtypes (19). Owing to its built-in genome targeting activity  
95 and reprogrammable feature, in recent years, repurposing the native CRISPR-Cas systems which  
96 are present in the vast number of prokaryotic genomes for genetic editing is emerging as an  
97 increasingly compelling strategy especially in those species with low transformation efficiency  
98 and poor homologous recombination. For instance, the native type I-B CRISPR-Cas system in *C.*  
99 *tyrobutyricum*, *C. pasteurianum*, *H. hispanica* (archaea) and the type I-A & III-B native CRISPR-  
100 Cas systems in *S. islandicus* (archaea) have been successfully harnessed for genome editing in the  
101 corresponding species recently (20-23). Whether the broadly distributed native CRISPR-Cas  
102 systems in *P. aeruginosa*, especially the most common subtype of I-F, can be harnessed for  
103 genome editing and functional genomics of antimicrobial resistance remains unexplored.  
104 Previously, we have isolated a MDR *P. aeruginosa* strain PA154197 which displays high epidemic  
105 potentials with a resistance profile (resistant to five of the seven commonly used antipseudomonal  
106 drugs) comparable to the international high-risk clone ST175 (24). A large number of resistant  
107 mutations were predicted by genomic analysis, including mutations in the DNA gyrase *gyrA* and  
108 Cephalosporinase *ampC* which are associated with resistance to fluoroquinolones and  $\beta$ -lactams  
109 (25, 26), respectively, and gene mutations causing over-production of three multidrug efflux  
110 pumps MexAB, MexEF, and MexGHI (Table S1). Sequencing data reveal that PA154197 contains

111 a native type I-F CRISPR-Cas locus in its genome. These together make PA154197 a paradigm to  
112 establish a genome editing approach by exploiting its native CRISPR-Cas system and exploit the  
113 system for AMR characterization in the native genetic background of a clinical MDR isolate.  
114 We successfully developed a single plasmid-mediated, one-step precise genomic manipulation  
115 technique in PA154197 by exploiting its native type I-F CRISPR-Cas system, and a two-step In-  
116 Del approach to edit the genomic loci lacking an effective PAM (protospacer adjacent motif)  
117 sequence. Exploiting this efficient technique, we revealed the key resistant determinants and the  
118 extensive synergy of different resistance mechanisms in shaping the MDR of PA154197 which  
119 were unrecognized by investigations in the laboratory strains. Moreover, the established genome  
120 editing system can be readily applied to two additional type I-F CRISPR-containing, clinical and  
121 environmental *P. aeruginosa* strains PA150567 and Ocean-100. These results demonstrated the  
122 general applicability of native CRISPR-based editing system in the characterization of resistance  
123 development of clinical MDR *P. aeruginosa* isolates, and presumably other species.

124

## 125 **RESULTS**

### 126 **PA154197 contains a functional type I-F CRISPR-Cas system.**

127 Analysing the native CRISPR-Cas loci in PA154197 identified the type I-F signature genes *cas8f*,  
128 *cas6f* and the unique *cas2-cas3* fusion of the system (Fig. 1A) (27). The *cas* operon of the system  
129 is found to be sandwiched by two convergent CRISPRs. Their consensus repeat sequence differs  
130 by only one nucleotide, and their spacers are nearly identical in size (32 bp). In addition, a number  
131 of spacers show significant homology to phage or putative prophage sequences (data not shown),  
132 suggesting the DNA interference potential of this system and the feasibility of exploiting this  
133 system for genome editing.

134 To harness the native CRISPR-Cas for genome editing, we first tested the genome targeting  
135 activity of the system. We selected *mexB* gene as the target gene for this purpose, which encodes  
136 the inner membrane component of the housekeeping efflux system MexAB-OprM. Previous  
137 studies revealed that the canonical target of the type I-F CRISPR-Cas system is 5'-CC-protospacer-  
138 3' (28) (note that our study follows the standard guide-centric PAM definition (29)). Hence, an  
139 internal 32-bp sequence preceded by a 5'-CC-3' PAM in *mexB* is selected as the target (PAM-  
140 protospacer). The 32-bp spacer flanked by 28-bp repeat sequences at both ends, termed as a mini-  
141 CRISPR, is then cloned into the pMS402 vector, which contains a kanamycin-resistant gene and  
142 a *lux* reporter cassette (30), to generate the targeting plasmid pAY5233 (Fig. 1B). To ensure its  
143 expression and efficient targeting, a strong promoter *Ptat* (31) is selected to drive the expression  
144 of the mini-CRISPR. To overcome the poor antibiotics-based selection of transformants in MDR  
145 strains, the *Ptat*-mini-CRISPR is cloned upstream of the *lux* operon in pMS402 in frame such that  
146 *Ptat* simultaneously drives the expression of the CRISPR element and the *lux* operon which assists  
147 transformant screening (Fig. 1B). When pAY5233 and the control plasmid pAY5211 (which  
148 contains all the elements described above except the mini-CRISPR fragment) were introduced into  
149 PA154197 cells, a dramatic decrease of the transformants recovery was observed comparing to the  
150 non-targeting control (Fig. 1C), implying the occurrence of the detrimental chromosome cleavage  
151 in the cell. This result confirms that the native CRISPR-Cas system is active in PA154197.

152

### 153 **Harnessing the native type I-F CRISPR-Cas system to delete the resistance gene *mexB*.**

154 To exploit the system for gene deletion ( $\Delta$ *mexB* as an example), we then assembled a 1-kb donor  
155 sequence consisting of the 500-bp upstream and 500-bp downstream of *mexB* for homologous  
156 recombination, and inserted it into pAY5233 to yield pAY5235, termed as the editing plasmid (Fig.

157 **1D**). The number of transformants of pAY5235 is significantly increased (by more than 10-fold)  
158 compared to pAY5233 (**Fig. 1C**), suggesting the occurrence of homologous recombination by the  
159 provision of the donor sequence. We randomly selected eight luminescence positive colonies for  
160 colony PCR and DNA sequencing validation and found four colonies showed the desired, scarless  
161 and precise deletion of *mexB* in the chromosome (**Fig. 1E and 1F**). These results demonstrate the  
162 success of genome editing by exploitation of the native type I-F CRISPR-Cas system in the clinical  
163 MDR isolate PA154197 by one-step introduction of a single editing plasmid.

164 The success rate of 4/8 seemed moderate. However, we speculate that it was due to the unusually  
165 large size (3141 bp) of *mexB* rather than the efficiency of the editing technique, as subsequent  
166 attempts to delete shorter fragments, i.e. 50-bp, 500-bp, or 1000-bp deletion within *mexB* (**Fig.**  
167 **S1A**), yielded significantly improved success rate, i.e. 8/8 (50-bp deletion), 7/8 (500-bp deletion),  
168 and 7/8 (1000-bp deletion) (**Fig. S1B**). Hence, the native CRISPR-based editing strategy we  
169 developed is efficient to knock out a target gene, since the average gene length in prokaryotes is  
170 ~1 kb (32). Indeed, the 4/8 successful rate for the 3-kb *mexB* is fairly high according to several  
171 recent reports (33, 34). Moreover, we found the editing plasmid can be readily cured following  
172 culturing the edited cells in the absence of the antibiotic (kanamycin) pressure overnight (**Fig. S2**),  
173 suggesting the feasibility of multiple rounds of gene editing using the reprogrammable pAY5235  
174 editing platform.

175 To examine the applicability of the technique in other type I-F CRISPR-Cas containing *P.*  
176 *aeruginosa* strains, we set out to construct *mexB* deletion in a carbapenem resistant clinical strain  
177 PA150567 (accession number: LSQQ00000000) isolated from the Queen Mary Hospital, Hong  
178 Kong and an environmental strain Ocean-100 (accession number: NMRS00000000) isolated from  
179 the North Pacific Ocean (35). As expected, transformation of the targeting plasmid pAY5233 led



180 to DNA interference in the two strains, and the editing plasmid pAY5235 achieved the desired  
181 *mexB* deletion with comparable successful rate as in PA154197 (Fig. S3), confirming the general  
182 applicability of the developed editing system in clinically and environmentally isolated, “non-  
183 model” *P. aeruginosa* strains.

184

185 **Over-expression of the MexAB-OprM and MexEF-OprN efflux pumps contributes**  
186 **significantly to the MDR of PA154197.**

187 Three multidrug efflux pumps MexAB-OprM, MexEF-OprN, MexGHI-OpmD were found to be  
188 hyper-expressed in PA154197 compared to PAO1 (24). To test their contribution to the resistance  
189 phenotype of the MDR strain, we first deleted *mexB*, *mexF*, and *mexH*, which encodes the inner  
190 membrane channel of the three efflux systems, respectively. We found that except for IPM,  $\Delta$ *mexB*  
191 leads to significant decrease in the MICs of all five classes of common antipseudomonal antibiotics  
192 PA154197 is resistant to (Table 1), i.e. ATM (64 to 1), CAZ (16 to 2), TZP (32 to 0.5), MEM (4  
193 to <0.125), CAR (>128 to 1), LVX (32 to 16), and CIP (16 to 8), with a greater effect on the  
194 antipseudomonal  $\beta$ -lactams (CAR, CAZ, MEM, ATM), and penicillin- $\beta$ -lactamase inhibitor  
195 combinations (TZP) than on fluoroquinolones (LVX and CIP).  $\Delta$ *mexF* leads to the decrease in  
196 MICs of antipseudomonal fluoroquinolones, i.e. LVX (32 to 16) and CIP (16 to 4), consistent with  
197 the previous report of the substrate profile of the pump using *mexEF-oprN* over-expression  
198 construct in PAO1 (36). Double deletion of *mexB* and *mexF* leads to dramatic decrease in MICs  
199 of all antipseudomonal antibiotics (except IPM) (Table 1) and several other antimicrobial agents  
200 tested (Table 2), suggesting that hyper-active drug efflux by these two pumps contributes  
201 significantly to the MDR profile of PA154197. Moreover, different from the observations obtained  
202 by over-expressing several *P. aeruginosa* efflux pumps in *E. coli* (15), significant synergy is

203 observed between the two tripartite efflux pumps in expelling their common substrates  
204 fluoroquinolones as evidenced by the MIC fold change in the  $\Delta mexB \Delta mexF$  double deletion strain  
205 (32-fold) relative to that in single deletion strain (2-fold decrease for LVX in both  $\Delta mexB$  and  
206  $\Delta mexF$ , and 2- and 4-fold decrease for CIP in  $\Delta mexB$  and  $\Delta mexF$ , respectively). Disk diffusion  
207 test showed similar susceptibility changes in these strains (Fig. S4). Analysis of the growth curves  
208 of these strains in the absence of antibiotics suggested that the observed MIC alterations were not  
209 due to intrinsic disadvantages or defects in growth (Fig. S5). Unexpectedly, deletion of another  
210 efflux gene *mexH* which is also hyper-expressed in PA154197 (~40-fold higher than in PAO1) (24)  
211 did not lead to any detectable difference in the MICs of all the antibiotics and antimicrobial agents  
212 tested (Table 1 and 2), suggesting that it does not contribute to the antibiotic resistance of  
213 PA154197.

214

215 **A G226T point mutation in *mexR* is responsible for the *mexAB-oprM* over-expression.**

216 Over-expression of efflux genes is often caused by mutations in their transcription regulators.  
217 Comparative genomic analysis revealed a single nucleotide substitution G226T (corresponding to  
218 introducing a stop codon at E76) in PA154197 *mexR* compared to that in PAO1 (Fig. S6A). MexR  
219 is a transcription repressor of *mexAB-oprM* genes (Fig. 2A) and mutations or pre-mature  
220 termination of the protein often leads to over-production of the MexAB-OprM pump and MDR in  
221 the cells (37-39). To investigate whether this mutation accounts for the over-expression of *mexAB-*  
222 *oprM*, we reprogramed the editing plasmid pAY5235 by replacing the mini-CRISPR and the donor  
223 sequences for *mexB* deletion with those for point mutation of *mexR*, respectively, and constructed  
224 the reverse mutation, i.e. T226G in *mexR*. Such editing results in the replacement of *mexR* gene in  
225 PA154197 with that from PAO1, hence, the resulting construct is designated as *mexR*<sup>PAO1</sup>. RT-

226 qPCR analysis revealed that the transcriptional level of *mexAB* genes in the *mexR*<sup>PAO1</sup> mutant is  
227 significantly reduced comparing with that in the wild-type PA154197, to a level that is similar in  
228 PAO1 (Fig. 2B and 2C), suggesting that the G226T mutation in *mexR* is responsible for the over-  
229 expression of *mexAB-oprM*. Both MIC analysis and disk diffusion test confirmed that the  
230 antibiotics susceptibility profile is similar between the *mexR*<sup>PAO1</sup> and  $\Delta$ *mexB* cells (Table 1 and 2,  
231 Fig. S4).

232

233 **An advanced two-step In-Del strategy to edit *mexT* verifies its role in *mexEF* over-expression**  
234 **and repression of *oprD*.**

235 The *mexT* gene encodes a transcription regulator of the *mexEF-oprN* efflux system (Fig. 2A) (9).  
236 Our comparative genomic analysis identified an 8-bp deletion in the PA154197 *mexT* compared  
237 to PAO1 *mexT* (24). Notably, PAO1 belongs to the “type II” wild type *P. aeruginosa* strains in  
238 which MexT is produced as an intrinsically inactive, out-of-frame variant (Fig. S6B) (40). The 8-  
239 bp deletion in PA154197 *mexT* principally enables the protein to be translated in-frame and  
240 produced as an active MexT transcription activator (40, 41). To verify this in the MDR strain  
241 PA154197, we attempted to construct the 8-bp insertion reverse mutation. However, the  
242 construction using the same one-step strategy for gene deletion and point mutation described above  
243 was not successful. Analysing the DNA sequence of the PAM-protospacer selected for the 8-bp  
244 insertion reveals the presence of two 6-bp repeats, which potentially obscures the recognition of  
245 the PAM and the subsequent DNA interference (Fig. S7).

246 To overcome this limitation, we devised a two-step Insert-Delete (In-Del) strategy to achieve  
247 editing in these inefficiently targeted sites (Fig. 3A). The approach bypasses the poorly targeted  
248 PAM-protospacer by exploiting a proximal auxiliary PAM (152-bp downstream of the desired 8-

249 bp insertion site) which can be targeted efficiently to firstly insert a 32-bp short tag (5'-  
250 TACAACAAGGACGACGACGACAAGGTGATCAG-3') between the PAM and the  
251 protospacer. Insertion of the desired 8-bp is subsequently achieved in the second round of editing  
252 by exploiting the same PAM but a different protospacer sequence (termed as the PAM-tag-  
253 protospacer) and the provision of a donor sequence which lacks the tag sequence but includes the  
254 desired insertion sequence, allowing simultaneous removal of the tag and introduction of the  
255 desired mutation (Fig. 3A). The success rate for the first and second round editing is found to be  
256 8/8 and 5/8 (Fig. 3B and 3C). This result demonstrates the success of our In-Del strategy, which  
257 principally allows genetic manipulations regardless of PAM limitation.

258 The resulting mutant is designated as *mexT*<sup>PAO1</sup>. RT-qPCR analysis revealed that transcription  
259 level of the *mexEF* genes in the *mexT*<sup>PAO1</sup> cells is reduced to a level that is similar in PAO1 (Fig.  
260 2D and 2E), suggesting that absence of 8-bp in *mexT* causes over-expression of *mexEF-oprN* in  
261 PA154197. Both MIC analysis and disk diffusion test confirmed that the antibiotics susceptibility  
262 profile is similar between the *mexT*<sup>PAO1</sup> and  $\Delta$ *mexF* cells (Table 1 and 2, Fig. S4). Notably, in  
263 addition to activate *mexEF-oprN*, MexT is also known to repress the expression of *oprD* (Fig. 2A),  
264 which encodes an important porin protein facilitating the diffusion of carbapenems antibiotics  
265 (especially IPM) (42). Hence, a reduced OprD production is frequently linked to increased  
266 tolerance to IPM resistance (43) which is observed in PA154197. We next conducted RT-qPCR  
267 analysis and found that the transcriptional level of *oprD* in the *mexT*<sup>PAO1</sup> cells is 3-fold higher than  
268 in the PA154197 parent, to a level that is similar in PAO1 (Fig. 2D and 2E). MIC and disk diffusion  
269 assays show increased susceptibility of *mexT*<sup>PAO1</sup> to IPM than the PA154197 parent (Table 1, Fig.  
270 S4). Together, these results indicate that the 8-bp deletion in *mexT* contributes to the resistance of  
271 PA154197 to fluoroquinolones and increased tolerance to IPM (breaking point of IPM is 4) by

272 simultaneously up-regulating the expression of *mexEF-oprN* and down-regulating the expression  
273 of *oprD*.

274

275 **Mutations in the essential gene *gyrA* constitutes another fluoroquinolone resistance**  
276 **determinant in PA154197.**

277 Although  $\Delta mexB \Delta mexF$  led to a dramatic decrease (32-fold) in MICs of the fluoroquinolones  
278 LVX (32 to 1) and CIP (16 to 0.5), the MIC values of the two antibiotics are still higher than that  
279 in PAO1 (both are 0.25), suggesting the presence of additional fluoroquinolone resistance  
280 determinants in PA154197. Two genetic variations in the DNA gyrase gene *gyrA* are identified in  
281 PA154197: the well-studied T248C substitution (corresponding to T83I) in the quinolone  
282 resistance determining region (QRDR) which abolishes (fluoro)quinolone binding (44), and a new  
283 genetic variation of 6-bp deletion (<sup>2723</sup>CCGAGT<sup>2728</sup>) in the C-terminal domain (CTD) of GyrA  
284 which is reported to fine-tune the ATP turnover and DNA supercoiling activity of the gyrase (45)  
285 (Fig. S6C). To investigate whether these genetic variations contribute to fluoroquinolone  
286 resistance, we employed the two-step In-Del strategy described above to replace the essential gene  
287 *gyrA* in PA154197 with that from PAO1, generating *gyrA*<sup>PAO1</sup> (Fig. S8). MIC analysis and disk  
288 diffusion assay showed that this gene replacement leads to 8- and 4-fold decrease in the MICs of  
289 LVX and CIP, respectively (Table 1), suggesting that the genetic variations in *gyrA* also play a  
290 significant role in the fluoroquinolone resistance in PA154197. The fact that the MICs fold change  
291 in *gyrA*<sup>PAO1</sup> relative to its PA154197 parent is consistent with that when the single T83I  
292 substitution is introduced into the laboratory strain PA14 (10) indicates that the contribution of  
293 *gyrA* mutation to the fluoroquinolone resistance of PA154197 is mainly due to the T83I  
294 substitution.

295

296 **Extensive synergy of different resistant mutations are present in PA154197.**

297 Previous investigations of the antibiotic resistance determinants and the substrate profile of  
298 multidrug efflux pumps in the laboratory model strains (10, 36) is often incapable of revealing the  
299 relative contribution and synergy of multiple, different resistance determinants owing to its  
300 susceptible strain background. To explore this, we constructed a series of single, double and triple  
301 mutations using the efficient editing technique developed and examined the relative contributions  
302 and interplay of the identified resistance determinants in PA154197. As shown in [Table 1](#), single  
303 deletion of *mexB*, *mexF*, or replacement of the *gyrA* gene with that of PAO1 (*gyrA*<sup>PAO1</sup>) led to a  
304 decrease of the LVX MIC to 1/2, 1/2, and 1/16 of the WT, and the CIP MIC to 1/2, 1/4, and 1/4 of  
305 the WT, respectively ([Table 1](#)), suggesting that mutations in *gyrA* play a greater role in causing  
306 fluoroquinolone resistance than the drug efflux by MexAB-OprM or MexEF-OprN. Inactivation  
307 of all three determinants (*gyrA*<sup>PAO1</sup> *mexR*<sup>PAO1</sup> *mexT*<sup>PAO1</sup> strain) leads to the complete loss of  
308 resistance to LVX and CIP (MIC being 1/128 of the WT), confirming that the three resistance  
309 determinants synergizing fluoroquinolone resistance in PA154197. Interestingly, in the case of  
310 another quinolone antimicrobial agent nalidixic acid, single or double interference of *mexB*  
311 (*mexR*<sup>PAO1</sup>), *mexF* (*mexT*<sup>PAO1</sup>), and *gyrA* (*gyrA*<sup>PAO1</sup>) has no effect on the resistance to this agent,  
312 and only simultaneous interference of all three determinants leads to the decrease of MIC to 1/4 of  
313 the WT, suggesting that these three genetic variations cooperates NAL resistance.

314 Our investigations above have demonstrated the synergy of MexAB-OprM and MexEF-OprN in  
315 expelling their common substrates of fluoroquinolones LVX and CIP. To further examine the  
316 substrates of these two efflux pumps and their interplay in expelling antimicrobials, the MIC  
317 alterations of several other antibiotics and antimicrobial agents are examined ([Table 2](#)). In addition

318 to LVX and CIP, we observed obvious synergy of the two pumps in the extrusion of trimethoprim  
319 (TMP) and chloramphenicol (CHL). Combining the MIC alterations in the  $\Delta mexB$ ,  $\Delta mexF$  and  
320  $\Delta mexB \Delta mexF$  presented in [Table 1 and 2](#), a rather complete substrates profile of the two efflux  
321 pumps with relative substrates preference is mapped ([Fig. 4](#)). This information enriched our  
322 understanding of the relative contributions of resistance determinants and their interplay in  
323 clinically isolated MDR strains using PA154197 as a paradigm.

324

## 325 **DISCUSSION**

326 Emergence of resistance to multiple antimicrobial agents in pathogenic bacteria has become a  
327 significant global public health threat as there are fewer, or even sometimes no, effective  
328 antimicrobial agents to treat the infections caused by these bacteria. The MDR/XDR international  
329 high-risk clones of *P. aeruginosa* are especially challenging in therapeutics owing to their  
330 extraordinary drug resistance and rapid dissemination in hospitals worldwide (46-48). Previous  
331 molecular epidemic analyses have largely focused on identification of genetic variations in the  
332 resistant isolates in comparison with the model strain PAO1 (49). To our knowledge, there has  
333 been no systematic, targeted molecular investigations of resistance development characterized  
334 directly in the native genetic background of clinical MDR isolates. In this study, we report the first  
335 single-plasmid-mediated, one-step genome editing technique directly applicable in the native  
336 CRISPR-Cas containing, clinical *P. aeruginosa* strains, and its exploitation in AMR  
337 characterization which provided new insight into the contribution and interplay of resistant  
338 mutations in shaping the clinically significant MDR.

339 In comparison with a recently reported heterologous Cas9-based genome editing method which  
340 requires successive transformation of two editing plasmids (33), and the conventional two-step

341 allelic exchange method (50) which takes more than two weeks to construct a mutant with an  
342 undesirable FLP site permanently remained in the edited site, our method using a single plasmid  
343 to achieve editing in one-step represents a more efficient and clean genome editing method which  
344 can be completed within one week, i.e. 3-4 days for constructing the editing plasmid and 2-3 days  
345 for the luminescence-assisted selection and verification. The two-step In-Del strategy further  
346 developed to circumvent the limitation of poorly targeted genomic loci principally allows us to  
347 conduct any non-lethal genetic manipulation in the bacterial genome (Fig. 5), greatly expanding  
348 and accelerating the molecular characterizations of the CRISPR-containing, MDR *P. aeruginosa*  
349 isolates. The methodology should be readily extended to other clinically significant pathogens,  
350 such as *Acinetobacter baumannii* and *Klebsiella spp.* to facilitate resistance characterization and  
351 interference in these species.

352 Employing this powerful and efficient genome editing methodology, we not only verified the  
353 previously proposed resistant mechanisms but also revealed the interplay of different resistant  
354 determinants previously unrecognized by investigations in model strains. The G226T substitution  
355 in *mexR* is a newly identified point mutation occurred in PA154197 that leads to the de-repression  
356 of *mexAB-oprM*. Three resistant mutations are found to synergize fluoroquinolone resistance, and  
357 mutations in *gyrA* elicit a greater extent of resistance than over-production of MexAB-OprM or  
358 MexEF-OprN. We speculate that mutations leading to over-production of MexAB-OprM and  
359 MexEF-OprN proceed the *gyrA* mutations in PA154197 as it has been documented that drug efflux  
360 not only directly causes antibiotic resistance by expelling structurally diverse antibiotics but also  
361 drives the acquisition of additional resistance mechanisms by lowering intracellular antibiotic  
362 concentration and promoting mutation accumulation (14, 51). Repression of MexAB-OprM and  
363 MexEF-OprN efflux systems, de-repressing the expression of the porin OrpD, combined with



364 reverse mutations in *gyrA* literally converted the MDR clinical strain PA154197 to a susceptible  
365 strain (*gyrA*<sup>PAO1</sup> *mexR*<sup>PAO1</sup> *mexT*<sup>PAO1</sup>), confirming the key roles these resistance determinants  
366 play in shaping MDR in PA154197. Lastly, we dissected substrates profile and preference of the  
367 MexAB-OprM and MexEF-OprN efflux pumps and revealed the obvious synergy of the two  
368 pumps in expelling of fluoroquinolones, trimethoprim, and chloramphenicol. Notably, studies  
369 carried out in a susceptible reference *P. aeruginosa* strain and in *E. coli* showed no synergy  
370 between MexAB-OprM and MexEF-OprN in expelling fluoroquinolones (10, 15). This  
371 discrepancy may be due to the different genetic background of the strains used which underlie the  
372 importance of investigating resistance development in the native genetic background of resistant  
373 isolates.

374 Although genome sequencing and comparative genomics can identify the genetic variations in  
375 resistance genes, whether and to what extent these variations contribute to the resistance phenotype  
376 cannot be disclosed merely by genomic and transcriptome analyses. For instance, we found that  
377 over-expression (~40 fold higher than in PAO1) of the efflux gene *mexH* and nucleotide  
378 substitution in *parS* does not contribute to the drug resistance in PA154197 (Table 1 and 2). These  
379 results suggest that not all genetic variations identified in resistance genes lead to the development  
380 of antibiotic resistance, further highlighting the importance of the targeted functional genomics  
381 investigations directly in the clinically isolated resistant strains.

382

## 383 MATERIAL AND METHODS

### 384 Bacterial strains, culture conditions.

385 All the bacterial strains used and constructed in this study are listed in Table S2. *E. coli* DH5 $\alpha$  is  
386 used for plasmid construction and is usually cultured at 37°C in Luria-Bertani (LB) broth or on the

387 LB agar plate supplemented with 20 µg/ml Kanamycin (KAN). *P. aeruginosa* PA154197 was  
388 isolated from the Queen Mary Hospital in Hong Kong, China (24). PA154197 and its derivatives  
389 were selected in LB (broth or agar) with 500 µg/ml KAN at 37°C.

390

### 391 **Plasmid construction.**

392 All the plasmids constructed and used in this study are listed in [Table S2](#). Mini-CRISPR element  
393 consisting of two repeats flanking the PAM-protospacer was synthesized by BGI (Shenzhen,  
394 China). PCR was performed using the iProof™ High-Fidelity DNA Polymerase (Bio-Rad, USA).  
395 Mini-CRISPR elements and plasmid pAY5211 were digested using the restriction enzymes KpnI  
396 and BamHI (NEB, USA) and ligated using the Quick Ligation Kit (NEB, USA) to generate the  
397 targeting plasmid. Donor sequences which typically contain 500-bp upstream and 500-bp  
398 downstream of the editing sites were amplified by PCR and ligated into the linearized targeting  
399 plasmid (digested by XhoI (NEB, USA)) using the ClonExpress One Step Cloning Kit (Vazyme,  
400 China). All the constructed plasmids were verified by DNA sequencing (BGI, China).

401

### 402 **Transformation of PA154197.**

403 Electrocompetent PA154197 cells were prepared by firstly innoculating a fresh colony in LB  
404 broth and grown at 37°C overnight with 220-rpm agitation. Following subculture into 50 ml fresh  
405 LB broth and growing to OD<sub>600</sub> = 0.5, cells were collected by centrifugation and washed three  
406 times with cold autoclaved Milli-Q H<sub>2</sub>O. The resulting cells were resuspended into 1 ml Milli-Q  
407 H<sub>2</sub>O. 100 µl electrocompetent PA154197 cells were then mixed with 1 µg editing plasmid and  
408 subject to electroporation (BTX, USA). 1 ml cold LB broth was added to recover the cells.  
409 Following culturing at 37°C for 1 h with agitation, cells were pelleted and resuspended in 100 µl

410 LB for spreading (LB+KAN500). Transformants colonies were obtained after incubation at 37°C  
411 for 16-20 h.

412

#### 413 **Mutant screening and verification.**

414 Colonies were firstly subjected to luminescence screening using the Synergy HTX Plate Reader  
415 (Bio Tek, USA). Colonies with high luminescent intensity were further verified by colony PCR  
416 using Taq DNA polymerase (Thermal Scientific, USA) with indicated primers and DNA  
417 sequencing (BGI, China). Sequencing results were visualized using DNA sequencing software  
418 Chromas (Technelysium Pty Ltd, Australia)

419

#### 420 **Curing of editing plasmid.**

421 *P. aeruginosa* cells underwent one round of editing was streaked onto the LB ager plate and  
422 incubated at 37°C overnight. Single colony was selected and the curing was verified by the failure  
423 of growth in LB with 100 µg/ml KAN.

424

#### 425 **Minimum inhibitory concentration (MIC) measurement.**

426 MIC was measured following the standard protocol of ASM with slight modification (52). A single  
427 fresh colony of PA154197 was inoculated in LB medium overnight at 37°C with agitation.  
428 Overnight culture was then diluted to cell density of 10<sup>5</sup>/ml, and 200 µl of the cells were distributed  
429 to each well of the 96-well plate. Antibiotics were then added with final concentrations ranging  
430 from 0.25 to 128 µg/ml. Plates were incubated at 37°C for 16-20 h and MIC value was determined  
431 by absorbance at 600 nm.

432

433 **Reverse transcription (RT)-quantitative PCR (qPCR).**

434 Bacterial cells from overnight culture were harvested by centrifugation at 4°C. Total RNA was  
435 extracted using RNeasy Mini Kit (Qiagen, Germany) according to the manufacturer's instruction.  
436 Reverse transcription was performed using PrimeScript RT reagent Kit (Takara, Japan). qPCR was  
437 performed using specific primers and the SYBR Green PCR master mix (Applied Biosystems,  
438 USA) in a 20 µl reaction system. The reaction was performed in ABI StepOnePlus real time PCR  
439 system with *recA* and *clpX* as reference genes to normalize the relative expression of the target  
440 genes. The results were expressed as fold change of the expression of target genes, and results  
441 were presented as the mean of three independent biological isolates.

442

443 **Disk diffusion assay.**

444 20 µl overnight culture as described above was mixed with 5 ml melted LB top agar (0.75 %) and  
445 poured on an LB agar plate. After the agar was solidified, round filter paper disks were placed. 5µl  
446 antibiotic solution (2 mg/ml) was added to the center of the paper disks. The plates were incubated  
447 at 37°C for 16 h.

448

449

450 **ACKNOWLEDGEMENT**

451 We thank Prof. Patrick CY Woo (Department of Microbiology, The University of Hong Kong) for  
452 providing the clinical PA isolates and Prof. Susumu Yoshizawa and Prof. Kazuhiro Kogure (Both  
453 from the University of Tokyo) for sharing the ocean-100 strain. We appreciate Dr. Xin Deng  
454 (Department of Biomedical Sciences, City University of Hong Kong) for the pMS402 vector.

455

456 This work was supported by the Hong Kong University Grants Council General Research Fund  
457 (HKU17142316 to A.Y.), Seed Funding for Basic Research Scheme of The University of Hong  
458 Kong (201711159278 to A.Y.), Seed Funding for Strategic Interdisciplinary Research Scheme  
459 (HKU 2017 to A.Y.), and National Natural Science Foundation of China (No. 31571283 to H.X.).

460

461 Z.X., M.L., H.X. and A.Y. designed research; Z.X. and Y.L. performed experiments; H.C.  
462 contributed to the bioinformatic analysis; Z.X., M.L., H.X. and A.Y. analysed data, wrote and  
463 revised the manuscript.

464

465 The authors do not have conflict of interests to declare.

466

467

468

## 469 REFERENCES

- 470 1. Oliver A, Mulet X, López-Causapé C, Juan C. 2015. The increasing threat of *Pseudomonas*  
471 *aeruginosa* high-risk clones. Drug Resist Updates 21:41-59.
- 472 2. Stover CK, Pham XQ, Erwin A, Mizoguchi S, Warrenner P, Hickey M, Brinkman F, Hufnagle  
473 W, Kowalik D, Lagrou M. 2000. Complete genome sequence of *Pseudomonas aeruginosa*  
474 PAO1, an opportunistic pathogen. Nature 406:959-964.
- 475 3. Poole K. 2011. *Pseudomonas aeruginosa*: resistance to the max. Front Microbiol 2:65.

- 476 4. Santajit S, Indrawattana N. 2016. Mechanisms of antimicrobial resistance in ESKAPE  
477 pathogens. *BioMed Res Int* 2016:2475067.
- 478 5. Magiorakos AP, Srinivasan A, Carey R, Carmeli Y, Falagas M, Giske C, Harbarth S, Hindler  
479 J, Kahlmeter G, Olsson-Liljequist B. 2012. Multidrug-resistant, extensively drug-resistant  
480 and pandrug-resistant bacteria: an international expert proposal for interim standard  
481 definitions for acquired resistance. *Clin Microbiol Infect* 18:268-281.
- 482 6. Hocquet D, Berthelot P, Roussel-Delvallez M, Favre R, Jeannot K, Bajolet O, Marty N,  
483 Grattard F, Mariani-Kurkdjian P, Bingen E, Husson MO, Couetdic G, Plesiat P. 2007.  
484 *Pseudomonas aeruginosa* may accumulate drug resistance mechanisms without losing its  
485 ability to cause bloodstream infections. *Antimicrob Agents Chemother* 51:3531-3536.
- 486 7. Cabot G, Ocampo-Sosa AA, Dominguez MA, Gago JF, Juan C, Tubau F, Rodriguez C, Moya  
487 B, Pena C, Martinez-Martinez L, Oliver A, Spanish Network for Research in Infectious D.  
488 2012. Genetic markers of widespread extensively drug-resistant *Pseudomonas aeruginosa*  
489 high-risk clones. *Antimicrob Agents Chemother* 56:6349-6357.
- 490 8. Hocquet D, Bertrand X, Kohler T, Talon D, Plesiat P. 2003. Genetic and phenotypic  
491 variations of a resistant *Pseudomonas aeruginosa* epidemic clone. *Antimicrob Agents*  
492 *Chemother* 47:1887-1894.
- 493 9. Köhler T, Epp SF, Curty LK, Pechère J-C. 1999. Characterization of MexT, the regulator of  
494 the MexE-MexF-OprN multidrug efflux system of *Pseudomonas aeruginosa*. *J Bacteriol*  
495 181:6300-6305.

- 496 10. Bruchmann S, Dötsch A, Nouri B, Chaberny IF, Häussler S. 2012. Quantitative contribution  
497 of target alteration and decreased drug accumulation to *Pseudomonas aeruginosa*  
498 fluoroquinolone resistance. *Antimicrob Agents Chemother* 57:1361-1368.
- 499 11. Riera E, Cabot G, Mulet X, Garcia-Castillo M, del Campo R, Juan C, Canton R, Oliver A.  
500 2011. *Pseudomonas aeruginosa* carbapenem resistance mechanisms in Spain: impact on the  
501 activity of imipenem, meropenem and doripenem. *J Antimicrob Chemother* 66:2022-2027.
- 502 12. Llanes C, Hocquet D, Vogne C, Benali-Baitich D, Neuwirth C, Plesiat P. 2004. Clinical  
503 strains of *Pseudomonas aeruginosa* overproducing MexAB-OprM and MexXY efflux pumps  
504 simultaneously. *Antimicrob Agents Chemother* 48:1797-1802.
- 505 13. Horna G, Lopez M, Guerra H, Saenz Y, Ruiz J. 2018. Interplay between MexAB-OprM and  
506 MexEF-OprN in clinical isolates of *Pseudomonas aeruginosa*. *Sci Rep* 8:16463.
- 507 14. Li XZ, Plesiat P, Nikaido H. 2015. The challenge of efflux-mediated antibiotic resistance in  
508 Gram-negative bacteria. *Clin Microbiol Rev* 28:337-418.
- 509 15. Lee A, Mao WM, Warren MS, Mistry A, Hoshino K, Okumura R, Ishida H, Lomovskaya O.  
510 2000. Interplay between efflux pumps may provide either additive or multiplicative effects  
511 on drug resistance. *J Bacteriol* 182:3142-3150.
- 512 16. Vogwill T, Kojadinovic M, MacLean RC. 2016. Epistasis between antibiotic resistance  
513 mutations and genetic background shape the fitness effect of resistance across species of  
514 *Pseudomonas*. *Proc R Soc B* 283:20160151.
- 515 17. de Sousa JM, Balbontín R, Durão P, Gordo IJPb. 2017. Multidrug-resistant bacteria  
516 compensate for the epistasis between resistances. *PLoS Biol* 15:e2001741.

- 517 18. Vogwill T, Kojadinovic M, Furio V, MacLean RC. 2014. Testing the role of genetic  
518 background in parallel evolution using the comparative experimental evolution of antibiotic  
519 resistance. *Mol Biol Evol* 31:3314-3323.
- 520 19. van Belkum A, Soriaga LB, LaFave MC, Akella S, Veyrieras J-B, Barbu EM, Shortridge D,  
521 Blanc B, Hannum G, Zambardi G. 2015. Phylogenetic distribution of CRISPR-Cas systems  
522 in antibiotic-resistant *Pseudomonas aeruginosa*. *MBio* 6:e01796-15.
- 523 20. Cheng F, Gong L, Zhao D, Yang H, Zhou J, Li M, Xiang H. 2017. Harnessing the native type  
524 IB CRISPR-Cas for genome editing in a polyploid archaeon. *J Genet Genomics* 44:541-548.
- 525 21. Zhang J, Zong W, Hong W, Zhang Z-T, Wang Y. 2018. Exploiting endogenous CRISPR-Cas  
526 system for multiplex genome editing in *Clostridium tyrobutyricum* and engineer the strain for  
527 high-level butanol production. *Metab Eng* 47:49-59.
- 528 22. Li Y, Pan S, Zhang Y, Ren M, Feng M, Peng N, Chen L, Liang YX, She Q. 2015. Harnessing  
529 Type I and Type III CRISPR-Cas systems for genome editing. *Nucleic Acids Res* 44:e34-e34.
- 530 23. Pyne ME, Bruder MR, Moo-Young M, Chung DA, Chou CP. 2016. Harnessing heterologous  
531 and endogenous CRISPR-Cas machineries for efficient markerless genome editing in  
532 *Clostridium*. *Sci Rep* 6: 25666.
- 533 24. Cao H, Xia T, Li Y, Xu Z, Bougouffa S, Lo YK, Bajic VB, Luo H, Woo PC, Yan A. 2018. A  
534 multidrug resistant clinical *P. aeruginosa* isolate in the MLST550 clonal complex: uncoupled  
535 quorum sensing modulates the interplay of virulence and resistance. *bioRxiv*  
536 <https://doi.org/10.1101/415000>.



- 537 25. Yonezawa M, Takahata M, Matsubara N, Watanabe Y, Narita H. 1995. DNA gyrase *gyrA*  
538 mutations in quinolone-resistant clinical isolates of *Pseudomonas aeruginosa*. *Antimicrob*  
539 *Agents Chemother* 39:1970-1972.
- 540 26. Juan C, Maciá MD, Gutiérrez O, Vidal C, Pérez JL, Oliver A. 2005. Molecular mechanisms  
541 of  $\beta$ -lactam resistance mediated by AmpC hyperproduction in *Pseudomonas aeruginosa*  
542 clinical strains. *Antimicrob Agents Chemother* 49:4733-4738.
- 543 27. Richter C, Gristwood T, Clulow JS, Fineran PC. 2012. In vivo protein interactions and  
544 complex formation in the *Pectobacterium atrosepticum* subtype IF CRISPR/Cas System.  
545 *PLoS One* 7:e49549.
- 546 28. Cady KC, Bondy-Denomy J, Heussler GE, Davidson AR, O'Toole GA. 2012. The  
547 CRISPR/Cas adaptive immune system of *Pseudomonas aeruginosa* mediates resistance to  
548 naturally occurring and engineered phages. *J Bacteriol* 194:5728-5738.
- 549 29. Leenay RT, Beisel CL. 2017. Deciphering, communicating, and engineering the CRISPR  
550 PAM. *J Mol Biol* 429:177-191.
- 551 30. Olsen RH, DeBusscher G, McCombie WR. 1982. Development of broad-host-range vectors  
552 and gene banks: self-cloning of the *Pseudomonas aeruginosa* PAO chromosome. *J Bacteriol*  
553 150:60-69.
- 554 31. Shah NC. 2014. PhD Thesis. University of Hertfordshire, Hatfield, Hertfordshire, UK.  
555 Construction and development of bioluminescent *Pseudomonas aeruginosa* strains;  
556 application in biosensors for preservative efficacy testing.

- 557 32. Xu L, Chen H, Hu XH, Zhang RM, Zhang Z, Luo ZW. 2006. Average gene length is highly  
558 conserved in prokaryotes and eukaryotes and diverges only between the two kingdoms. *Mol*  
559 *Biol Evol* 23:1107-1108.
- 560 33. Chen W, Zhang Y, Zhang Y, Pi Y, Gu T, Song L, Wang Y, Ji Q. 2018. CRISPR/Cas9-based  
561 genome editing in *Pseudomonas aeruginosa* and cytidine deaminase-mediated base editing  
562 in *Pseudomonas* species. *iScience* 6:222-231.
- 563 34. Chen W, Zhang Y, Yeo W-S, Bae T, Ji Q. 2017. Rapid and efficient genome editing in  
564 *Staphylococcus aureus* by using an engineered CRISPR/Cas9 system. *J Am Chem Soc*  
565 139:3790-3795.
- 566 35. Kumagai Y, Yoshizawa S, Nakamura K, Ogura Y, Hayashi T, Kogure K. 2017. Complete  
567 and Draft Genome Sequences of Eight Oceanic *Pseudomonas aeruginosa* Strains. *Genome*  
568 *Announc* 5:e01255-17.
- 569 36. Köhler T, Michéa-Hamzehpour M, Henze U, Gotoh N, Kocjancic Curty L, Pechère JC. 1997.  
570 Characterization of MexE–MexF–OprN, a positively regulated multidrug efflux system of  
571 *Pseudomonas aeruginosa*. *Mol Microbiol* 23:345-354.
- 572 37. Sánchez P, Rojo F, Martínez JL. 2002. Transcriptional regulation of *mexR*, the repressor of  
573 *Pseudomonas aeruginosa mexAB-oprM* multidrug efflux pump. *FEMS Microbiol Lett*  
574 207:63-68.
- 575 38. Adewoye L, Sutherland A, Srikumar R, Poole K. 2002. The *mexR* repressor of the *mexAB-*  
576 *oprM* multidrug efflux operon in *Pseudomonas aeruginosa*: characterization of mutations  
577 compromising activity. *J Bacteriol* 184:4308-4312.

- 578 39. Saito K, Yoneyama H, Nakae T. 1999. *nalB*-type mutations causing the overexpression of  
579 the MexAB-OprM efflux pump are located in the *mexR* gene of the *Pseudomonas aeruginosa*  
580 chromosome. FEMS Microbiol Lett 179:67-72.
- 581 40. Maseda H, Saito K, Nakajima A, Nakae T. 2000. Variation of the *mexT* gene, a regulator of  
582 the MexEF-oprN efflux pump expression in wild-type strains of *Pseudomonas aeruginosa*.  
583 FEMS Microbiol Lett 192:107-112.
- 584 41. Linares JF, López JA, Camafeita E, Albar JP, Rojo F, Martínez JL. 2005. Overexpression  
585 of the multidrug efflux pumps MexCD-OprJ and MexEF-OprN is associated with a reduction  
586 of type III secretion in *Pseudomonas aeruginosa*. J Bacteriol 187:1384-1391.
- 587 42. Quale J, Bratu S, Gupta J, Landman D. 2006. Interplay of efflux system, *ampC*, and *oprD*  
588 expression in carbapenem resistance of *Pseudomonas aeruginosa* clinical isolates.  
589 Antimicrob Agents Chemother 50:1633-1641.
- 590 43. Köhler T, Michea-Hamzehpour M, Epp SF, Pechere J-C. 1999. Carbapenem activities against  
591 *Pseudomonas aeruginosa*: respective contributions of OprD and efflux systems. Antimicrob  
592 Agents Chemother 43:424-427.
- 593 44. Varughese LR, Rajpoot M, Goyal S, Mehra R, Chhokar V, Beniwal V. 2018. Analytical  
594 profiling of mutations in quinolone resistance determining region of *gyrA* gene among UPEC.  
595 PloS one 13:e0190729.
- 596 45. Tretter EM, Berger JM. 2012. Mechanisms for Defining Supercoiling Set Point of DNA  
597 Gyrase Orthologs I. A NONCONSERVED ACIDIC C-TERMINAL TAIL MODULATES  
598 *ESCHERICHIA COLI* GYRASE ACTIVITY. J Biol Chem 287:18636-18644.

- 599 46. Breidenstein EB, de la Fuente-Núñez C, Hancock RE. 2011. *Pseudomonas aeruginosa*: all  
600 roads lead to resistance. Trends Microbiol 19:419-426.
- 601 47. Cheng VC, Wong SC, Ho P-L, Yuen K-Y. 2016. Strategic measures for the control of surging  
602 antimicrobial resistance in Hong Kong and mainland of China. Emerg Microbes Infect 4:e8.
- 603 48. Wright GD. 2016. Antibiotic adjuvants: rescuing antibiotics from resistance. Trends  
604 Microbiol 24:862-871.
- 605 49. Jia B, Raphenya AR, Alcock B, Waglechner N, Guo P, Tsang KK, Lago BA, Dave BM,  
606 Pereira S, Sharma AN. 2016. CARD 2017: expansion and model-centric curation of the  
607 comprehensive antibiotic resistance database. Nucleic Acids Res 45(D1):D566-D573.
- 608 50. Choi K-H, Schweizer HP. 2005. An improved method for rapid generation of unmarked  
609 *Pseudomonas aeruginosa* deletion mutants. BMC Microbiol 5:30.
- 610 51. Sun J, Deng Z, Yan A. 2014. Bacterial multidrug efflux pumps: mechanisms, physiology and  
611 pharmacological exploitations. Biochem Biophys Res Commun 453:254-267.
- 612 52. Lalitha M. 2004. Manual on antimicrobial susceptibility testing. Performance standards for  
613 antimicrobial testing: Twelfth Informational Supplement 56238:454-456.

614

615

616 **FIGURE AND TABLE LEGENDS**

617 **FIG 1 Repurposing the functional native CRISPR-Cas system for gene deletion. (A)**

618 Schematic representation of the native type I-F CRISPR-Cas in PA154197. Diamonds and  
619 rectangles indicate the repeat and spacer units of a CRISPR array, respectively. Curved arrows (in  
620 black) above the leader sequence (in brown) indicate the orientation of CRISPR transcription. The  
621 consensus repeat of the two CRISPR arrays differs by one nucleotide (in red). **(B)** Schematic  
622 showing the design of the *mexB*-targeting plasmid (pAY5233) and the *mexB*-deletion donor. The  
623 mini-CRISPR in pAY5233 comprises a 32-bp spacer (in blue) targeting the *mexB* gene and two  
624 flanking repeats (in yellow), and is co-expressed with the reporter *lux* operon (in green) under the  
625 control of the strong promoter *Ptat*. The PAM sequence is framed. The donor (in pink) consists of  
626 sequences upstream (U1) and downstream (D1) of *mexB*. The *KpnI* and *BamHI* sites are used for  
627 mini-CRISPR insertion and the *XhoI* site is used for one-step cloning of the donor. **(C)**  
628 Representative plates showing the transformation efficiency of the vector control pAY5211, the  
629 targeting plasmid pAY5233, and the editing plasmid pAY5235. **(D)** Design of the *mexB*-deletion  
630 plasmid pAY5235 which contains both the self-targeting CRISPR and the repair donor. **(E)** Eight  
631 randomly selected transformants were subjected to colony PCR to screen for the  $\Delta$ *mexB* mutants  
632 (positive clones are highlighted in red). Primers used in colony PCR (F1/R1) are indicated in panel  
633 **(B)**. **(F)** The screened  $\Delta$ *mexB* mutants in **(E)** were further validated by DNA sequencing.

634

635 **FIG 2 Expression levels of the *mexAB*, *mexEF* and *oprD* genes in PAO1, PA154197 and its**

636 **isogenic mutants *mexR*<sup>PAO1</sup>, *mexT*<sup>PAO1</sup>.** **(A)** Schematic showing the regulation of *mexAB-oprM*,  
637 *mexEF-oprN* and *oprD* in *P. aeruginosa*. MexR represses the expression of *mexAB-oprM*; MexT  
638 activates *mexEF-oprN* and represses *oprD*. **(B&C)** Transcription alteration of *mexA* and *mexB* in

639 PA154197 and in PAO1, and in PA154197 and its isogenic *mexR*<sup>PAO1</sup> mutant. Transcription of  
640 *mexF* in the two strains serves as a negative control whose expression is not affected by MexR.  
641 **(D&E)** Transcription alteration of *mexE*, *mexF* and *oprD* in PA154197 and in PAO1, and in  
642 PA154197 and its isogenic *mexT*<sup>PAO1</sup> mutant. Transcription of *mexA* in the two strains serves as a  
643 negative control whose expression is not affected by MexT.

644  
645 **FIG 3 The two-step In-Del editing strategy (taking insertion of 8 bp into *mexT* as an example).**

646 **(A)** Schematic design of the two-step In-Del method. In the first step, a 32-bp exogenous DNA  
647 sequence (tag, in pink) is introduced to an auxiliary target site (in blue), between its PAM and  
648 protospacer portions. In the second step, a tag-targeting CRISPR, as well as a tag-lacking donor  
649 which contains the desired mutation (8-bp insertion in this case), is provided to simultaneously  
650 remove the exogenous tag and achieve the desired mutation. **(B)** Randomly selected luminescence  
651 positive colonies from the two steps were subjected to colony PCR using the primers F3/Seq-R3  
652 (indicated in panel **A**). Desired mutants are highlighted in red. **(C)** Targets in the potential mutants  
653 from the two steps were amplified using the primers Seq-F3/Seq-R3 (indicated in panel **A**) and  
654 validated by DNA sequencing. Representative DNA sequencing results from the two steps are  
655 shown, where the tag sequence is shown in pink.

656  
657 **FIG 4 Substrate scheme of the MexAB-OprM and MexEF-OprN efflux systems.** Substrate  
658 profiles of the MexAB-OprM and MexEF-OprN and their preferences are shown schematically  
659 based on the MIC alterations (Table 1 and 2) in the  $\Delta mexB$ ,  $\Delta mexF$ ,  $\Delta mexB \Delta mexF$  and *gyrA*<sup>PAO1</sup>  
660 *mexT*<sup>PAO1</sup> *mexR*<sup>PAO1</sup> cells relative to the WT. The greater the MIC changes in the single mutant  
661 relative to the WT, the stronger substrates they are denoted. The strength of the substrate

662 preference is expressed by the color key shown, except for the CHL, NAL and TMP (in grey)  
663 which MICs were only changed in double or triple mutants.

664  
665 **FIG 5 Schematic diagram of the native type I-F CRISPR-Cas mediated genome editing in**  
666 **PA154197 and its exploitations in functional genomics investigation.** Desired mutants with  
667 altered resistance (or virulence, other physiology) can be obtained in one step by introducing a  
668 programmable editing plasmid, which carries a mini-CRISPR (expressing a crRNA) and a repair  
669 donor, into the MDR/XDR PA154197 cells with ready luminescence selection. The crRNA directs  
670 the Cascade complex to the target. Recombination occurs between the repair donor and the target  
671 area to prevent the target interference, resulting in the desired mutation. Two-step editing can be  
672 utilized to obtain mutations in the genetic loci that cannot be well targeted by CRISPR. A red  
673 asterisk indicates a resistant determinant in PA154197. Cells containing the editing plasmid  
674 expressing the *lux* genes are shown in light green.

675  
676 **Table 1.** MICs ( $\mu\text{g/ml}$ ) of various antipseudomonal antibiotics in PAO1, PA154197 and its isogenic  
677 mutants

678  
679 **Table 2.** MICs ( $\mu\text{g/ml}$ ) of various antibiotics and antimicrobial agents in PAO1, PA154197 and its  
680 isogenic mutants

681  
682 **FIGURE AND TABLE LEGENDS FOR SUPPLEMENTAL MATERIALS**

683 **FIG S1 Effect of desired truncation lengths on the efficiency of editing.** (A) Schematic diagram  
684 of the genetic locus of *mexB* and adjacent region. Desired truncation fragments of 50 bp (B1, 74-

685 123), 500 bp (B2, 74-573), 1000 bp (B3, 74-1073), the full length (*mexB*, 1-3141), and the primers  
686 to test these truncations are shown. **(B)** Positive clones of each of truncations in eight randomly  
687 selected transformants are highlighted in red.

688

689 **FIG S2 Curing of the editing plasmid in the edited cells.** Edited cells could not grow in the  
690 presence of kanamycin (100 µg/ml) after plasmid curing, which was achieved by culturing the  
691 edited cells without antibiotic pressure overnight.

692

693 **FIG S3 Harnessing the native type I-F CRISPR-Cas system for genome editing in other *P.***  
694 ***aeruginosa* isolates.** The single editing plasmid pAY5235 was transformed in the clinical *P.*  
695 *aeruginosa* isolate PA150567 and the environmental isolate Ocean-100 to achieve *mexB* deletion  
696 in one-step. Eight randomly selected luminescent transformants were subjected to colony PCR to  
697 screen for the desired  $\Delta$ *mexB* mutants. Positive clones are highlighted in red. Primers used in  
698 colony PCR are indicated in Figure 1B.

699

700 **FIG S4 Disk diffusion assay of the antibiotic susceptibilities of PA154197 and its isogenic**  
701 **mutants.** Disk diffusion test is conducted to examine the susceptibility of PA154197 and its  
702 isogenic mutants to eight antipseudomonal drugs **(A)** and six other antibiotics and antimicrobial  
703 agents **(B)**. Larger inhibition zone represents the higher susceptibility to the indicated antibiotics.

704

705 **FIG S5 Growth curves of PA154197 and its isogenic mutants in the absence of antibiotics.**

706 No difference of growth among PA154197 and its isogenic mutants were observed.

707



708 **FIG S6 Comparative genomics reveals mutations in the key antibiotic resistance genes *mexR*,**  
709 ***mexT* and *GyrA* in PA154197. (A)** The point mutation (G226T) in PA154197 *mexR* gene leads  
710 to premature termination of its protein product. **(B)** An 8-bp deletion in PA154197 *mexT* relative  
711 to that in PAO1 converts the out-of-frame *mexT* product to the in-frame, active form of *mexT*  
712 product. **(C)** PA154197 *gyrA* gene contains a T248C substitution (corresponding to T83I in the  
713 *GyrA* protein) in the quinolone resistance-determining region (QRDR) and a <sup>2723</sup>CCGAGT<sup>2728</sup> 6-  
714 bp deletion (corresponding to the deletion of E959&S960) in the C terminal domain of the gene  
715 product.

716  
717 **FIG S7 Non-efficient targeting at the desired editing site in the *mexT* gene. (A)** Schematic  
718 showing the desired 8-bp insertion (CGGCCAGC) into the *mexT* gene. The 6-bp repeat sequences  
719 (in red) in the target which potentially obscure the targeting by the CRISPR-Cas apparatus are  
720 shown. PAM is shown in frame. **(B)** No desirable DNA interference was observed by transforming  
721 the *mexT*-targeting plasmid pAY5900 into PA154197 cells in comparison with the control plasmid  
722 pAY5211. Note that no repair donor was provided in this plasmid.

723  
724 **FIG S8 Replacing the essential gene *gyrA* with that from PAO1 using the two-step In-Del**  
725 **method. (A)** Schematic showing the two-step strategy for *gyrA* gene replacement. The tag  
726 sequence (in pink) is first introduced downstream of *gyrA* (in orange) between the PAM and  
727 protospacer portions of a selected target (in blue). In the second step, a tag-targeting plasmid  
728 carrying the repair donor (Del-donor) is provided. Del-donor lacks the tag sequence but contains  
729 the *gyrA* gene (in dark blue) from PAO1, which is flanked by two ~1000-bp sequences upstream  
730 and downstream of the PA154197 *gyrA* gene. The primer pairs F/Seq-R and Seq-F/Seq-R were

731 used for the colony PCR analysis in (B) and DNA sequencing, respectively. **(B)** Eight luminescent  
732 positive transformants from each editing step were randomly selected for colony PCR analysis.  
733 Desired mutants confirmed by DNA sequencing are highlighted in red.

734

735 **Table S1.** A summary of mutational changes in the antibiotic resistance (AR) genes in PA154197  
736 by comparative genomic analysis

737

738 **Table S2.** Bacterial strains, plasmids used in this study

739

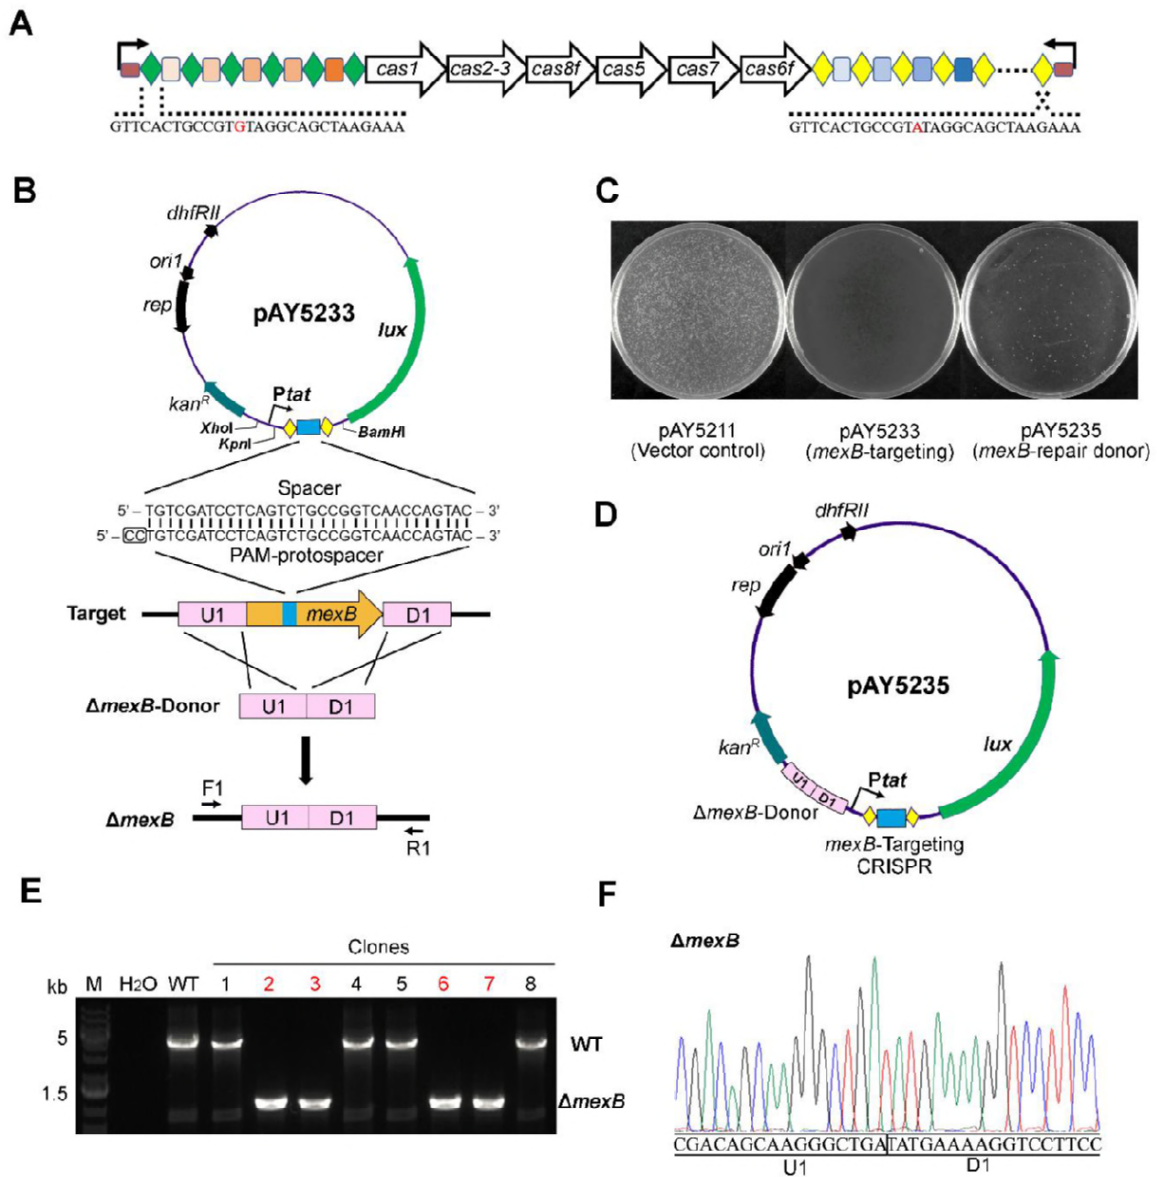

**FIG 1 Repurposing the functional native CRISPR-Cas system for gene deletion. (A)**

Schematic representation of the native type I-F CRISPR-Cas in PA154197. Diamonds and rectangles indicate the repeat and spacer units of a CRISPR array, respectively. Curved arrows (in black) above the leader sequence (in brown) indicate the orientation of CRISPR transcription. The consensus repeat of the two CRISPR arrays differs by one

nucleotide (in red). **(B)** Schematic showing the design of the *mexB*-targeting plasmid (pAY5233) and the *mexB*-deletion donor. The mini-CRISPR in pAY5233 comprises a 32-bp spacer (in blue) targeting the *mexB* gene and two flanking repeats (in yellow), and is co-expressed with the reporter *lux* operon (in green) under the control of the strong promoter *Ptat*. The PAM sequence is framed. The donor (in pink) consists of sequences upstream (U1) and downstream (D1) of *mexB*. The *KpnI* and *BamHI* sites are used for mini-CRISPR insertion and the *XhoI* site is used for one-step cloning of the donor. **(C)** Representative plates showing the transformation efficiency of the vector control pAY5211, the targeting plasmid pAY5233, and the editing plasmid pAY5235. **(D)** Design of the *mexB*-deletion plasmid pAY5235 which contains both the self-targeting CRISPR and the repair donor. **(E)** Eight randomly selected transformants were subjected to colony PCR to screen for the  $\Delta$ *mexB* mutants (positive clones are highlighted in red). Primers used in colony PCR (F1/R1) are indicated in panel (B). **(F)** The screened  $\Delta$ *mexB* mutants in (E) were further validated by DNA sequencing.

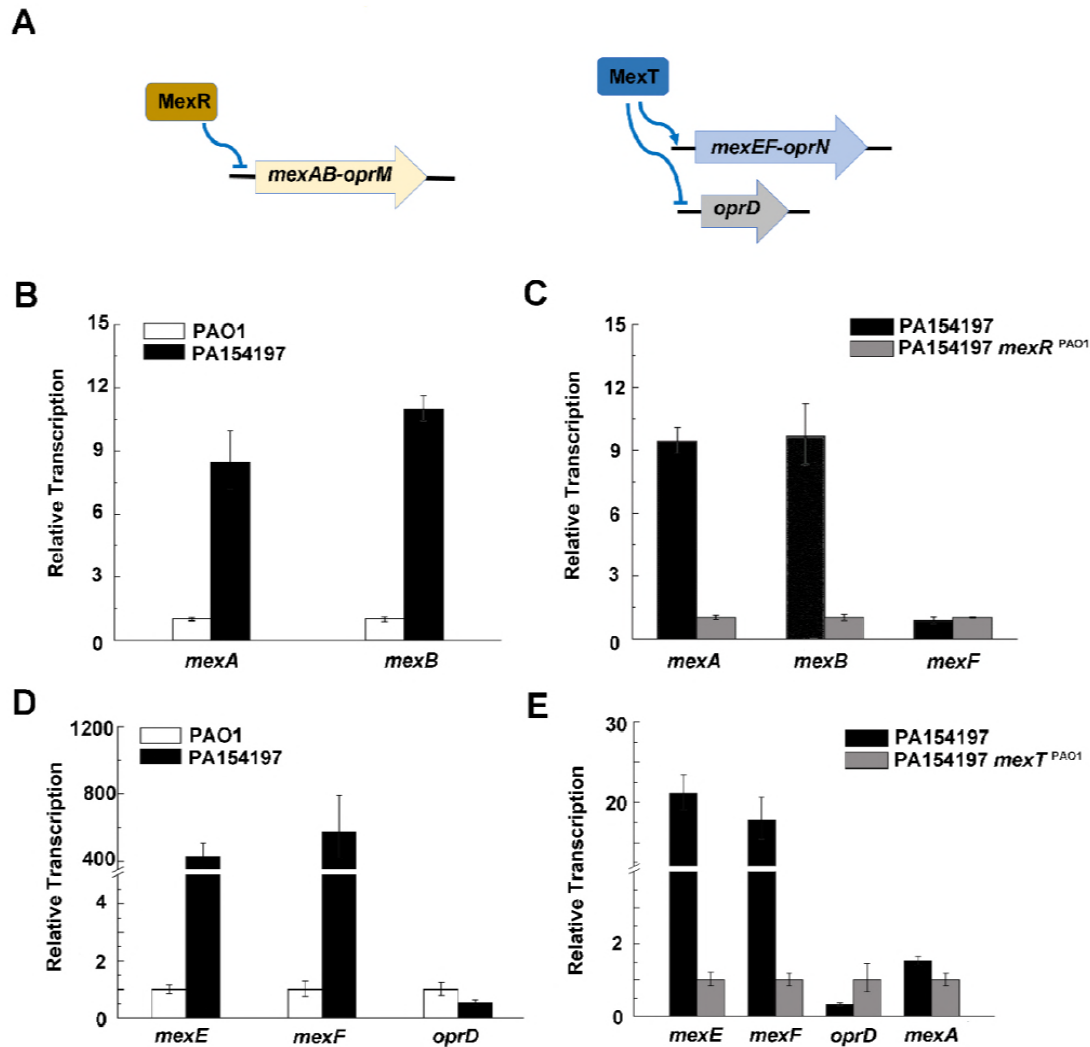

**FIG 2** Expression levels of the *mexAB*, *mexEF* and *oprD* genes in PAO1, PA154197

and its isogenic mutants *mexR*<sup>PAO1</sup>, *mexT*<sup>PAO1</sup>. (A) Schematic showing the regulation of

*mexAB-oprM*, *mexEF-oprN* and *oprD* in *P. aeruginosa*. MexR represses the expression

of *mexAB-oprM*; MexT activates *mexEF-oprN* and represses *oprD*. (B&C) Transcription

alteration of *mexA* and *mexB* in PA154197 and in PAO1, and in PA154197 and its

isogenic *mexR*<sup>PAO1</sup> mutant. Transcription of *mexF* in the two strains serves as a negative

control whose expression is not affected by MexR. (D&E) Transcription alteration of

*mexE*, *mexF* and *oprD* in PA154197 and in PAO1, and in PA154197 and its isogenic *mexT*<sup>PAO1</sup> mutant. Transcription of *mexA* in the two strains serves as a negative control whose expression is not affected by MexT.

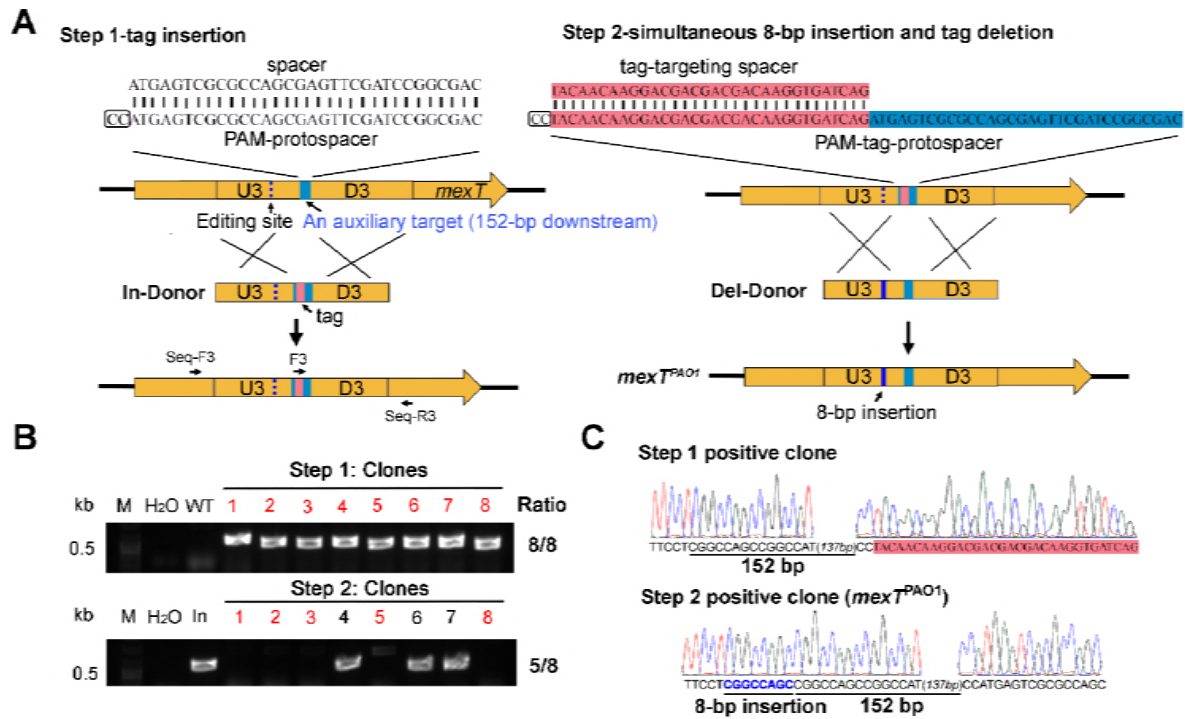

**FIG 3 The two-step In-Del editing strategy (taking insertion of 8 bp into *mexT* as an example).** (A) Schematic design of the two-step In-Del method. In the first step, a 32-bp exogenous DNA sequence (tag, in pink) is introduced to an auxiliary target site (in blue), between its PAM and protospacer portions. In the second step, a tag-targeting CRISPR, as well as a tag-lacking donor which contains the desired mutation (8-bp insertion in this case), is provided to simultaneously remove the exogenous tag and achieve the desired mutation. (B) Randomly selected luminescence positive colonies from the two steps were subjected to colony PCR using the primers F3/Seq-R3 (indicated in panel A). Desired mutants are highlighted in red. (C) Targets in the potential mutants from the two steps were amplified using the primers Seq-F3/Seq-R3 (indicated in panel A) and validated by

DNA sequencing. Representative DNA sequencing results from the two steps are shown, where the tag sequence is shown in pink.



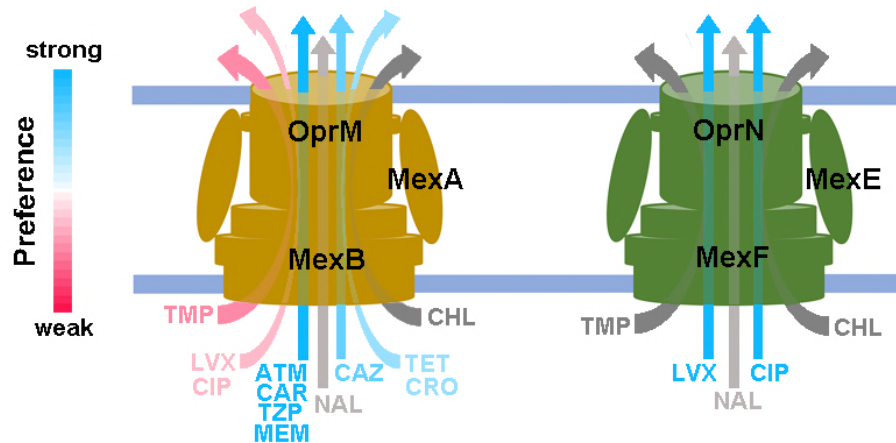

**FIG 4 Substrate scheme of the MexAB-OprM and MexEF-OprN efflux systems.**

Substrate profiles of the MexAB-OprM and MexEF-OprN and their preferences are shown schematically based on the MIC alterations (Table 1 and 2) in the  $\Delta mexB$ ,  $\Delta mexF$ ,  $\Delta mexB \Delta mexF$  and  $gyrA^{PAO1} mexT^{PAO1} mexR^{PAO1}$  cells relative to the WT. The greater the MIC changes in the single mutant relative to the WT, the stronger substrates they are denoted. The strength of the substrate preference is expressed by the color key shown, except for the CHL, NAL and TMP (in grey) which MICs were only changed in double or triple mutants.

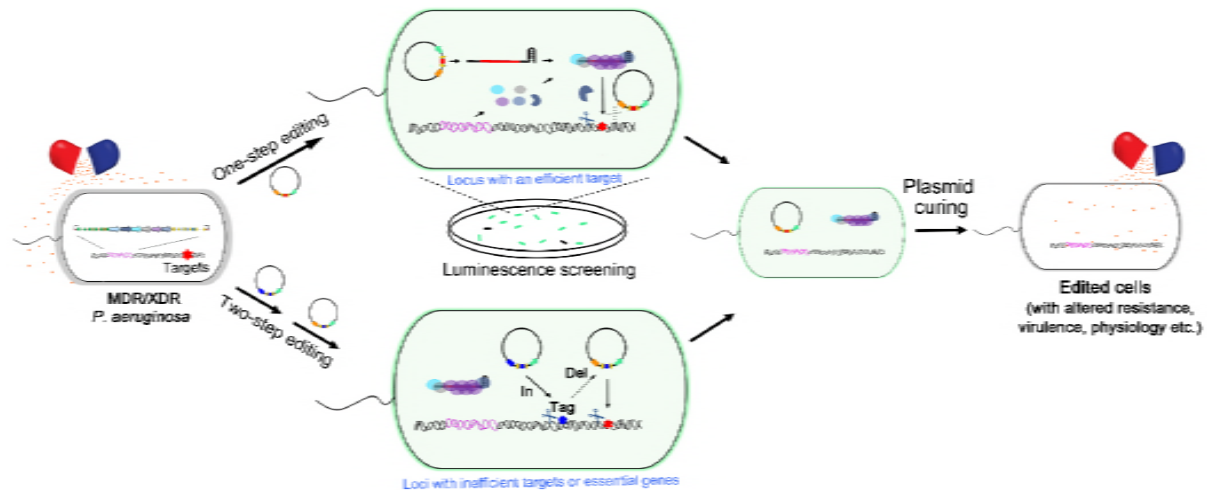

**FIG 5 Schematic diagram of the native type I-F CRISPR-Cas mediated genome editing in PA154197 and its exploitations in functional genomics investigation.**

Desired mutants with altered resistance (or virulence, other physiology) can be obtained in one step by introducing a programmable editing plasmid, which carries a mini-CRISPR (expressing a crRNA) and a repair donor, into the MDR/XDR PA154197 cells with ready luminescence selection. The crRNA directs the Cascade complex to the target. Recombination occurs between the repair donor and the target area to prevent the target interference, resulting in the desired mutation. Two-step editing can be utilized to obtain mutations in the genetic loci that cannot be well targeted by CRISPR. A red asterisk indicates a resistant determinant in PA154197. Cells containing the editing plasmid expressing the *lux* genes are shown in light green.

**Table 1.** MICs ( $\mu\text{g/ml}$ ) of various antipseudomonal antibiotics in PAO1, PA154197 and its isogenic mutants

| Strains                                                    | ATM                | CAZ            | TZP               | MEM                | CAR              | LVX                 | CIP                      | IPM            |
|------------------------------------------------------------|--------------------|----------------|-------------------|--------------------|------------------|---------------------|--------------------------|----------------|
| PAO1                                                       | 4                  | 1              | 2                 | 0.5                | 32               | 0.25                | 0.25                     | 2              |
| PA154197                                                   | <b>64</b>          | <b>16</b>      | <b>32</b>         | <b>4</b>           | <b>&gt;128</b>   | <b>32</b>           | <b>16</b>                | <b>4</b>       |
| Mutations lead to increased drug susceptibilities:         |                    |                |                   |                    |                  |                     |                          |                |
| $\Delta mexB$                                              | <b>1</b> (1/64)    | <b>2</b> (1/8) | <b>0.5</b> (1/64) | <b>&lt;0.125</b>   | <b>1</b> (1/128) | <b>16</b> (1/2)     | <b>8</b> (1/2)           | 4              |
| $\Delta mexF$                                              | 64                 | 16             | 32                | 4                  | >128             | <b>16</b> (1/2)     | <b>4</b> (1/4)           | 4              |
| $\Delta mexB \Delta mexF$                                  | <b>0.5</b> (1/128) | <b>2</b> (1/8) | <b>0.5</b> (1/64) | <b>&lt;0.125</b>   | <b>1</b> (1/128) | <b>1</b> (1/32)     | <b>0.5</b> (1/32)        | 4              |
| $mexR^{\text{PAO1}}$                                       | <b>4</b> (1/16)    | <b>4</b> (1/4) | <b>4</b> (1/4)    | <b>0.5</b> (1/8)   | <b>64</b> (1/2)  | <b>16</b> (1/2)     | <b>8</b> (1/2)           | 4              |
| $mexT^{\text{PAO1}}$                                       | 64                 | 16             | 32                | 4                  | >128             | <b>16</b> (1/2)     | <b>4</b> (1/4)           | <b>2</b> (1/2) |
| $mexR^{\text{PAO1}} mexT^{\text{PAO1}}$                    | <b>4</b> (1/16)    | <b>4</b> (1/4) | <b>4</b> (1/4)    | <b>0.25</b> (1/16) | <b>64</b> (1/2)  | <b>2</b> (1/16)     | <b>0.5</b> (1/32)        | <b>2</b> (1/2) |
| $gyrA^{\text{PAO1}}$                                       | 64                 | 16             | 32                | 4                  | >128             | <b>2</b> (1/16)     | <b>4</b> (1/4)           | 4              |
| $gyrA^{\text{PAO1}} mexR^{\text{PAO1}}$                    | <b>4</b> (1/16)    | <b>4</b> (1/4) | <b>4</b> (1/4)    | <b>0.5</b> (1/8)   | <b>64</b> (1/2)  | <b>2</b> (1/16)     | <b>0.5</b> (1/32)        | 4              |
| $gyrA^{\text{PAO1}} mexT^{\text{PAO1}}$                    | 32                 | 16             | 32                | 4                  | >128             | <b>2</b> (1/16)     | <b>0.5</b> (1/32)        | <b>2</b> (1/2) |
| $gyrA^{\text{PAO1}} mexR^{\text{PAO1}} mexT^{\text{PAO1}}$ | <b>4</b> (1/16)    | <b>4</b> (1/4) | <b>4</b> (1/4)    | <b>0.25</b> (1/16) | <b>64</b> (1/2)  | <b>0.25</b> (1/128) | <b>&lt;0.125</b> (1/128) | <b>2</b> (1/2) |
| Mutations do not lead to increased drug susceptibilities:  |                    |                |                   |                    |                  |                     |                          |                |
| $\Delta mexH$                                              | 64                 | 16             | 32                | 4                  | >128             | 32                  | 16                       | 4              |
| $parS^{\text{PAO1}}$                                       | 64                 | 16             | 32                | 4                  | >128             | 32                  | 16                       | 4              |

**ATM:** Aztreonam; **CAZ:** Ceftazidime; **TZP:** piperacillin-tazobactam; **MEM:** Meropenem; **CAR:** Carbenicillin; **LVX:** Levofloxacin; **CIP:** Ciprofloxacin; **IPM:** Imipenem

**Table 2.** MICs ( $\mu\text{g/ml}$ ) of various antibiotics and antimicrobial agents in PAO1, PA154197 and its isogenic mutants

| Strains                                                    | NAL      | TMP      | CRO      | TET     | CHL      | SDS  |
|------------------------------------------------------------|----------|----------|----------|---------|----------|------|
| PAO1                                                       | 32       | 32       | 4        | 8       | 32       | >128 |
| PA154197                                                   | >128     | 128      | 64       | 32      | >128     | >128 |
| Mutations lead to increased drug susceptibilities:         |          |          |          |         |          |      |
| $\Delta mexB$                                              | >128     | 64 (1/2) | 16 (1/4) | 8 (1/4) | >128     | >128 |
| $\Delta mexF$                                              | >128     | 128      | 64       | 32      | >128     | >128 |
| $\Delta mexB \Delta mexF$                                  | >128     | 4 (1/32) | 8 (1/8)  | 4 (1/8) | 4 (1/32) | >128 |
| $mexR^{\text{PAO1}}$                                       | >128     | 64 (1/2) | 8 (1/8)  | 8 (1/4) | >128     | >128 |
| $mexT^{\text{PAO1}}$                                       | >128     | 128      | 64       | 32      | >128     | >128 |
| $mexR^{\text{PAO1}} mexT^{\text{PAO1}}$                    | >128     | 32 (1/4) | 8 (1/8)  | 8 (1/4) | 16 (1/8) | >128 |
| $gyrA^{\text{PAO1}}$                                       | >128     | 128      | 64       | 32      | >128     | >128 |
| $gyrA^{\text{PAO1}} mexR^{\text{PAO1}}$                    | >128     | 64 (1/2) | 8 (1/8)  | 8 (1/4) | >128     | >128 |
| $gyrA^{\text{PAO1}} mexT^{\text{PAO1}}$                    | >128     | 128      | 64       | 32      | >128     | >128 |
| $gyrA^{\text{PAO1}} mexR^{\text{PAO1}} mexT^{\text{PAO1}}$ | 32 (1/4) | 32 (1/4) | 8 (1/8)  | 8 (1/4) | 16 (1/8) | >128 |
| Mutations do not lead to increased drug susceptibilities:  |          |          |          |         |          |      |
| $\Delta mexH$                                              | >128     | 128      | 64       | 32      | >128     | >128 |
| $parS^{\text{PAO1}}$                                       | >128     | 128      | 64       | 32      | >128     | >128 |

**NAL:** Nalidixic acid; **TMP:** Trimethoprim; **CRO:** Ceftriaxone; **TET:** Tetracycline; **CHL:** Chloramphenicol; **SDS:** Sodium dodecyl sulfate
