1 **Native CRISPR-Cas mediated in situ genome editing reveals the exquisite interplay of**  
2 **resistance mutations in clinical multidrug resistant *Pseudomonas aeruginosa***

3

4 Zeling Xu, <sup>1¶</sup> Ming Li, <sup>2¶</sup> Yanran Li, <sup>1</sup> Huiluo Cao, <sup>1,#</sup> Patrick CY Woo, <sup>3</sup> Hua Xiang, <sup>2\*</sup> Aixin  
5 Yan <sup>1\*</sup>

6

7 <sup>1</sup> School of Biological Sciences, The University of Hong Kong, Hong Kong SAR, China

8 <sup>2</sup> State Key Laboratory of Microbial Resources, Institute of Microbiology, Chinese Academy  
9 of Sciences, Beijing, China

10 <sup>3</sup> Department of Microbiology, Li Ka Shing Faculty of Medicine, The University of Hong  
11 Kong, Hong Kong SAR, China

12 <sup>#</sup> Current Address: Department of Microbiology, Li Ka Shing Faculty of Medicine, The  
13 University of Hong Kong, Hong Kong SAR, China

14

15 \* Corresponding author

16 E-mail: xiangh@im.ac.cn (HX) or ayan8@hku.hk (AY)

17

18 ¶ These authors contributed equally to this work.

19

20 **Short title:** Harnessing the native CRISPR-Cas system to tackle clinical multidrug resistance

21

22

## 23 **Abstract**

24 Antimicrobial resistance (AMR) is imposing a global public health threat. Despite its  
25 importance, resistance characterization in the native background of clinically isolated resistant  
26 pathogens is frequently hindered by the lack of genome editing tools in these “non-model”  
27 strains. *Pseudomonas aeruginosa* is both a prototypical multidrug resistant (MDR) pathogen  
28 and a model species for understanding CRISPR-Cas functions. In this study, we report the  
29 successful development of the first native type I-F CRISPR-Cas mediated, one-step genome  
30 editing technique in a paradigmatic MDR strain PA154197. The technique is readily applicable  
31 in additional type I-F CRISPR-containing, clinical/environmental *P. aeruginosa* isolates. A  
32 two-step In-Del strategy is further developed to edit genomic locus lacking an effective PAM  
33 (protospacer adjacent motif) or within an essential gene, which together principally allows any  
34 type of non-lethal genomic manipulations in these strains. Exploiting these powerful  
35 techniques, a series of reverse mutations are constructed and the key resistant determinants of  
36 the MDR PA154197 are elucidated which include over-production of two multidrug efflux  
37 pumps MexAB-OprM and MexEF-OprN, and a typical fluoroquinolone (FQ) resistance  
38 mutation T83I in the drug target gene *gyrA*. Characterizing antimicrobial susceptibilities in  
39 isogenic strains containing various combinations of single, double, or all three key resistance  
40 determinants reveal that i) extensive synergy exists between the target mutation and over-  
41 production of efflux pumps, and between the two over-produced tripartite efflux pumps to  
42 confer clinically significant FQ resistance; ii) while basal level MexAB-OprM confers  
43 resistance only to penicillins, its over-production leads to substantial resistance to all  
44 antipseudomonas  $\beta$ -lactams and additional resistance to FQs; iii) despite the acquisition and  
45 over-production of multiple resistant mutations, no obvious evolutionary trade-off of collateral  
46 sensitivity is developed in PA154197. Together, these results provide new insights into

47 resistance development in clinical MDR *P. aeruginosa* strains and demonstrate the great  
48 potentials of native CRISPR systems in AMR research.

49

## 50 **Author Summary**

51 Genome editing and manipulation can revolutionize the understanding, exploitation, and  
52 control of microbial species. Despite the presence of well-established genetic manipulation  
53 tools in various model strains, their applicability in the medically, environmentally, and  
54 industrially important, “non-model” strains is often hampered owing to the vast diversity of  
55 DNA homeostasis in these strains and the cytotoxicity of the heterologous CRISPR-Cas9/Cpf1  
56 systems. Harnessing the native CRISPR-Cas systems broadly distributed in prokaryotes with  
57 built-in genome targeting activity presents a promising and effective approach to resolve these  
58 obstacles. We explored and exploited this methodology in the prototypical multidrug resistant  
59 (MDR) pathogen *P. aeruginosa* by exploiting the most common subtype of the native CRISPR  
60 systems in the species. Our successful development of the first type I-F CRISPR-mediated  
61 genome editing technique and its subsequent extension to additional clinical and environmental  
62 *P. aeruginosa* isolates opens a new avenue to the functional genomics of antimicrobial  
63 resistance. As a proof-of-concept, we characterized the resistance development in a  
64 paradigmatic MDR *P. aeruginosa* isolate and found extensive resistance synergy and the lack  
65 of collateral sensitivity in the strain, implying the extraordinary pathoadaptation capability of  
66 clinical MDR strains and challenges to eradicate them.

67

## 68 **Introduction**

69 Antimicrobial resistance (AMR) is imposing an alarming threat to the global public health. Of  
70 particular challenging in clinics are those “ESKAPE” pathogens which constitute the major  
71 sources of nosocomial infections and are extraordinary to engender resistance, i.e.  
72 *Enterococcus spp.*, *Staphylococcus aureus*, *Klebsiella spp.*, *Acinetobacter baumannii*,  
73 *Pseudomonas aeruginosa*, and *Enterobacter spp.*. Owing to its intrinsic resistance to a variety  
74 of antimicrobials and the enormous capacity of developing acquired resistance during  
75 antibiotics chemotherapies, *Pseudomonas aeruginosa* is recognized as the prototypical  
76 multidrug resistant (MDR) pathogen [1-4]. Remarkably, in recent years, international high-risk  
77 clones of MDR *P. aeruginosa* have emerged and have been shown to cause worldwide  
78 outbreaks [5]. Genetic analyses reveal that these clones often contain a complex set of  
79 resistance markers [6-8] including both the genetic variations that cause resistance to specific  
80 classes of antibiotics, such as mutations in drug targets and acquisition of drug modification  
81 enzymes, and those conferring simultaneous resistance to multiple drugs, such as over-  
82 expression of multidrug efflux pumps. However, key genetic mutations responsible for the  
83 MDR development of clinically significant resistant isolates in their native genetic  
84 backgrounds remain undetermined. Furthermore, relative contributions and the interplay of  
85 different resistance determinants which shape the MDR profile of resistant isolates and imply  
86 the corresponding treatment regimens remain largely elusive.

87 Current knowledge of the resistance determinants and their mechanisms are largely obtained  
88 by reconstitution in laboratory model strains [9, 10]. Several studies indicated that there is a  
89 lack of multiplicative or synergetic effects between over-expression of multidrug efflux pumps,  
90 and between efflux and the mechanisms causing resistance to specific classes of antibiotics,  
91 such as over-expression of the cephalosporinase AmpC and mutations in the DNA gyrase GyrA  
92 or topoisomerase IV ParC [11-14]. It was reported that synergistic interactions occur when  
93 different types of multidrug efflux systems operate simultaneously, i.e. the tripartite resistance-

94 nodulation-division (RND) efflux pumps and the single component pump (e.g. TetA/C) [15].  
95 Antagonistic interplay of different RND efflux pumps was also reported, especially in the *nfxC*  
96 type MDR *P. aeruginosa* isolates in which over-production of the MexEF-OprN pump is often  
97 concomitant with an impairment of the MexAB-OprM pump in the strain, resulting in a high  
98 resistance to quinolones but a hyper-susceptibility to  $\beta$ -lactams [16, 17]. Compounding the  
99 complexity of the resistant mutation networks is the effect of genetic background of resistant  
100 strains and epistasis among different resistant mutations which are increasingly recognized to  
101 play important roles in resistance development and affect the effectiveness of antibiotic  
102 chemotherapies [18-20]. Hence, it is necessary to identify the key resistant determinants and  
103 their collateral effects in the native genetic background of clinical MDR strains. Yet, these  
104 molecular characterizations are often hindered by the lack of efficient and readily applicable  
105 genomic editing tools in these “non-model” strains.

106 In addition to be a prototypical MDR pathogen, *P. aeruginosa* is an important model system  
107 for understating CRISPR-Cas functions, especially the type I CRISPR-Cas system.  
108 Phylogenetic analysis revealed that CRISPR-Cas systems are widely distributed in global  
109 AMR *P. aeruginosa* isolates with more than 90% belonging to the I-E or I-F subtypes [21].  
110 Owing to its built-in genome targeting activity and reprogrammable feature, in recent years,  
111 repurposing the native CRISPR-Cas systems present in the large number of prokaryotes for  
112 genetic editing is emerging as a promising strategy for functional genetics, especially in those  
113 species with low transformation efficiency and poor homologous recombination. For instance,  
114 the native type I-B CRISPR-Cas system in *C. tyrobutyricum*, *C. pasteurianum*, *H. hispanica*  
115 (archaea) and the type I-A & III-B native CRISPR-Cas systems in *S. islandicus* (archaea) have  
116 been successfully harnessed for genome editing in the corresponding species recently [22-25].  
117 Whether the broadly distributed native CRISPR-Cas systems in *P. aeruginosa*, especially the

118 most common subtype of I-F, can be harnessed for genome editing and functional genomics of  
119 antimicrobial resistance remains unexplored.

120 Previously, we have isolated a MDR *P. aeruginosa* strain PA154197 which displays high  
121 epidemic potentials with a resistance profile (resistant to five of the seven commonly used  
122 antipseudomonal drugs) comparable to the international high-risk clone ST175 [26]. A large  
123 number of resistant mutations were predicted by genomic analysis, including mutations in the  
124 DNA gyrase *gyrA* and Cephalosporinase *ampC* which are associated with resistance to  
125 fluoroquinolones (FQ) and  $\beta$ -lactams [27, 28], respectively, and gene mutations potentially  
126 causing over-production of three multidrug efflux pumps MexAB, MexEF, and MexGHI (S1  
127 Table). Genome sequencing reveals that PA154197 contains a native type I-F CRISPR-Cas  
128 locus. These together renders PA154197 a paradigm to explore the harnessing of a native type  
129 I-F CRISPR-Cas system for genome editing in a clinical MDR *P. aeruginosa* strain and  
130 exploiting the system for AMR characterization in its native genetic background.

131 In this study, we report the successful development of a single plasmid-mediated, one-step,  
132 precise genomic manipulation technique in PA154197 by exploiting its native type I-F  
133 CRISPR-Cas system, and a two-step In-Del approach to edit the genomic loci lacking an  
134 effective PAM (protospacer adjacent motif) sequence. Exploiting this efficient and powerful  
135 technique, a series of single, double, and triple mutations of key resistant determinants are  
136 constructed, and their interplay in resistance synergy and potential collateral effects are  
137 investigated, providing a comprehensive functional genetics investigation of clinical MDR  
138 which have implications in clinical treatment of MDR infections. Lastly, we examine the  
139 applicability of the established editing technique in two additional type I-F CRISPR-containing,  
140 clinical and environmental *P. aeruginosa* strains PA150567 and Ocean-100. Together, these  
141 results demonstrate the general applicability of native CRISPR-based editing system in the

142 characterization of resistance development of clinical MDR *P. aeruginosa* isolates, and  
143 presumably other species.

144

## 145 **Results**

### 146 **PA154197 contains a functional type I-F CRISPR-Cas system.**

147 Analysing the genome sequence of PA154197 reveals the presence of the signature *cas8f* and  
148 *cas6f* genes and the unique *cas2-cas3* fusion in its CRISPR-Cas loci, suggesting that the system  
149 belongs to the subtype I-F (Fig 1A) [29]. The *cas* operon of the system is found to be  
150 sandwiched by two convergent CRISPRs. Their consensus repeat sequence differs by only one  
151 nucleotide, and their spacers are nearly identical in size (32 bp). In addition, a number of  
152 spacers show significant homology to phage or putative prophage sequences (data not shown),  
153 suggesting the DNA interference potential of this CRISPR-Cas system and the feasibility of  
154 exploiting the system for genome editing.

155 To harness the native CRISPR-Cas for genome editing, it is necessary to first examine its  
156 endogenous genome targeting activity. We select *mexB* as the target gene for this purpose,  
157 which encodes the inner membrane component of the housekeeping efflux system MexAB-  
158 OprM. Previous studies revealed that the canonical target of the type I-F CRISPR-Cas system  
159 is 5'-CC-protospacer-3' [30] (note that our study follows the standard guide-centric PAM  
160 definition [31]). Hence, an internal 32-bp sequence preceded by a 5'-CC-3' PAM in *mexB* is  
161 selected as the target (PAM-protospacer). A functional mini-CRISPR which is composed of  
162 the 32-bp spacer flanked by 28-bp repeat sequences at both ends is then synthesized and cloned  
163 into the expression vector pMS402, which contains a kanamycin-resistant gene and a *lux*  
164 reporter cassette [32], to generate the targeting plasmid pAY5233 (Fig 1B). To ensure the  
165 expression of the mini-CRISPR and efficient targeting, a strong promoter *P<sub>tat</sub>* [33] is selected

166 and cloned upstream to drive its expression in pAY5233. To overcome the poor antibiotics-  
167 based selection of transformants in MDR strains, the *Ptat*-mini-CRISPR is positioned upstream  
168 of the *lux* operon in frame in pAY5233 such that *Ptat* simultaneously drives the expression of  
169 both the CRISPR element and the *lux* operon which assists the transformant screening (Fig 1B).  
170 When the targeting plasmid pAY5233 and the control plasmid pAY5211 (which contains all  
171 the elements described above except the mini-CRISPR fragment) were introduced into  
172 PA154197 cells, a dramatic decrease of the transformants recovery was observed comparing  
173 to the non-targeting control (Fig 1C), implying the occurrence of the detrimental chromosome  
174 cleavage in the pAY5233-containing cells. This result confirms that the native CRISPR-Cas  
175 system is active in PA154197.

176

#### 177 **Harnessing the native type I-F CRISPR-Cas system to delete the resistance gene *mexB*.**

178 To exploit the system for gene deletion ( $\Delta mexB$  as an example), we then assemble a 1-kb donor  
179 sequence consisting of the 500-bp upstream and 500-bp downstream of *mexB* for homologous  
180 recombination, and insert it into pAY5233 to yield pAY5235, termed as the editing plasmid  
181 (Fig 1D). The number of transformants of pAY5235 is significantly increased (by more than  
182 10-fold) compared to pAY5233 (Fig 1C), suggesting the occurrence of homologous  
183 recombination by provision of the donor sequence. We randomly selected eight luminescence  
184 positive colonies for validation and found four colonies showed the desired, scarless and  
185 precise deletion of *mexB* in the chromosome (Fig 1E and 1F). These results demonstrate the  
186 success of genome editing by exploitation of the native type I-F CRISPR-Cas system in the  
187 clinical MDR isolate PA154197 by one-step introduction of a single editing plasmid.

188 The success rate of 4/8 seemed moderate. However, we speculate that it was due to the  
189 unusually large size (3141 bp) of *mexB* rather than the efficiency of the editing technique, as  
190 subsequent attempts to delete shorter fragments, i.e. 50-bp, 500-bp, or 1000-bp within *mexB*



191 (S1A Fig), yielded significantly improved success rate, i.e. 8/8 (50-bp deletion), 7/8 (500-bp  
192 deletion), and 7/8 (1000-bp deletion) (S1B Fig). Given that the average length of a prokaryotic  
193 gene is ~1 kb [34], the native CRISPR-based editing strategy we developed is efficient to knock  
194 out a target gene. Indeed, the 4/8 successful rate for the 3-kb *mexB* is fairly high according to  
195 several recent reports [35, 36]. Moreover, we found the editing plasmid can be readily cured  
196 following culturing the edited cells in the absence of the antibiotic (kanamycin) pressure  
197 overnight (S2 Fig), suggesting the feasibility of multiple rounds of gene editing using the  
198 reprogrammable pAY5235 editing platform.

199 To examine the applicability of the technique in other type I-F CRISPR-Cas containing *P.*  
200 *aeruginosa* strains, we set out to construct *mexB* deletion in a carbapenem resistant clinical  
201 strain PA150567 (accession number: LSQQ00000000) isolated from the Queen Mary Hospital,  
202 Hong Kong and an environmental strain Ocean-100 (accession number: NMRS00000000)  
203 isolated from the North Pacific Ocean [37]. As expected, transformation of the targeting  
204 plasmid pAY5233 led to DNA interference in the two strains, and the editing plasmid pAY5235  
205 achieved the desired *mexB* deletion with comparable successful rate as in PA154197 (S3 Fig),  
206 confirming the general applicability of the developed editing system in clinically and  
207 environmentally isolated, “non-model” *P. aeruginosa* strains.

208

209 **Over-expression of the MexAB-OprM and MexEF-OprN efflux pumps contributes**  
210 **substantially to the MDR of PA154197.**

211 Three multidrug efflux pumps MexAB-OprM, MexEF-OprN, MexGHI-OpmD were found to  
212 be hyper-expressed in PA154197 compared to PAO1 [26]. To test their contribution to the  
213 MDR phenotype of the strain, we first delete *mexB*, *mexF*, and *mexH*, which encodes the inner  
214 membrane channel of the three efflux systems, respectively. We find that except for IPM,  
215  $\Delta$ *mexB* leads to substantial decrease in the MICs of all antipseudomonal antibiotics PA154197

216 is resistant to (Fig 2 and S2 Table), i.e. ATM (64 fold), CAZ (8 fold), TZP (64 fold), MEM (>  
217 32 fold), CAR (>128 fold), LVX (2 fold), and CIP (2 fold), with a greater effect on the  
218 antipseudomonal  $\beta$ -lactams (CAR, CAZ, MEM, ATM), and penicillin- $\beta$ -lactamase inhibitor  
219 combinations (TZP) than on fluoroquinolones (LVX and CIP).  $\Delta mexF$  leads to the decrease in  
220 MICs of antipseudomonal fluoroquinolones, i.e. LVX (2 fold) and CIP (4 fold), consistent with  
221 the previous report of their substrates profiles by ectopic over-expression of the pumps in  
222 PAO1 [38]. Double deletion of *mexB* and *mexF* leads to dramatic decrease in MICs of all  
223 antipseudomonal antibiotics (except IPM) and several other antimicrobial agents tested (Fig 2  
224 and S2 Table), suggesting that hyper-active drug efflux by these two pumps contributes  
225 substantially to the MDR profile of PA154197. Moreover, different from the observations  
226 obtained by over-expressing the pumps in *E. coli* which showed no synergy between two  
227 tripartite pumps [15], substantial synergy is observed between the over-expressed MexAB-  
228 OprM and MexEF-OprN pumps in PA154197 to expel their common substrates FQs as  
229 evidenced by the MIC values in the  $\Delta mexB \Delta mexF$  double deletion strain relative to that in  
230  $\Delta mexB$  and  $\Delta mexF$  single deletion strain. Quantifying these interaction using the fractional  
231 inhibitory concentration index (FICI) [39] also demonstrates the substantial synergy of the two  
232 pumps in LVX (FICI 0.125) and CIP (FICI 0.188) resistance (Fig 2). Disk diffusion test  
233 confirms the susceptibility changes in these strains (S4 Fig). Analysis of the growth curves of  
234 these strains in the absence of antibiotics suggests that the observed MIC alterations are not  
235 due to intrinsic disadvantages or defects in growth (S5 Fig). Unexpectedly, deletion of another  
236 efflux gene *mexH* which is also hyper-expressed in PA154197 (~40-fold higher than in PAO1)  
237 [26] does not lead to any detectable difference in the MICs of all the antibiotics and  
238 antimicrobial agents tested (Fig 2 and S2 Table). Further deletion of *mexH* in the  $\Delta mexB$   
239  $\Delta mexF$  strain yields no MIC change either (data not shown), suggesting that it does not  
240 contribute to the antibiotic resistance in PA154197.

241

242 **A G226T point mutation in *mexR* is responsible for the *mexAB-oprM* over-expression.**

243 Over-expression of efflux genes is often caused by mutations in their transcription regulators.  
244 Comparative genomic analysis revealed a single nucleotide substitution G226T (corresponding  
245 to introducing a stop codon following E76) in PA154197 *mexR* compared to PAO1 (S6A Fig).  
246 Mutations or pre-mature termination of the MexR often leads to over-production of the  
247 MexAB-OprM pump (Fig 3A) and MDR in the cells [40-42]. To investigate whether this point  
248 mutation accounts for the over-expression of *mexAB-oprM* in PA154197, we reprogramed the  
249 editing plasmid pAY5235 by replacing the mini-CRISPR and the donor sequences for deleting  
250 *mexB* with those for point mutation of *mexR*, respectively, and constructed the reverse mutation  
251 T226G. The resulting construct is designated as *mexR*<sup>PAO1</sup>. Transcriptional level of *mexAB*  
252 genes in the *mexR*<sup>PAO1</sup> mutant is found to be significantly reduced comparing with that in the  
253 wild-type (WT) PA154197, to a level that is similar in PAO1 (Fig 3B), suggesting that the  
254 G226T mutation in *mexR* is responsible for the over-expression of *mexAB-oprM*. Both MIC  
255 analysis and disk diffusion test confirm that *mexR*<sup>PAO1</sup> causes decreases in MICs of all MexAB-  
256 OprM substrates (Fig 2 and S4 Fig).

257

258 **An advanced two-step In-Del strategy to edit *mexT* verifies its role in *mexEF-oprN* over-  
259 expression and reduced *oprD* expression.**

260 The *mexT* gene encodes a transcription regulator of the *mexEF-oprN* efflux system (Fig 3A)  
261 [9]. Comparative genomic analysis identified an 8-bp deletion in PA154197 *mexT* (S6B Fig),  
262 a *nfxC* type resistant mutation which is proposed to convert the intrinsically inactive, out-of-  
263 frame variant of *mexT* as that encoded in PAO1 to a translationally in-framed active MexT that  
264 activates *mexEF-oprN* [43, 44]. To verify this effect in the MDR strain PA154197, we  
265 attempted to construct the 8-bp insertion reverse mutation. However, construction using the

266 same one-step strategy for gene deletion and point mutation described above was not successful  
267 (S7 Fig). Analysing the nucleotides sequence of the PAM-protospacer for the 8-bp insertion  
268 reveals the presence of two 6-bp repeats, which potentially obscures the CRISPR recognition  
269 of the PAM and the subsequent DNA interference (S7 Fig).

270 To overcome this limitation, we devise a two-step Insert-Delete (In-Del) strategy to edit this  
271 inefficiently targeted site (Fig 4A). The approach bypasses the poorly targeted PAM-  
272 protospacer by exploiting a proximal, auxiliary PAM (152-bp downstream of the desired 8-bp  
273 insertion site) which can be efficiently targeted to firstly insert a 32-bp short tag (5'-  
274 TACAACAAGGACGACGACGACAAGGTGATCAG-3') between the PAM and the  
275 protospacer. The editing of introducing a short tag is applied as both its insertion and  
276 subsequent removal is highly efficient. The desired 8-bp insertion is then achieved in the  
277 second round of editing during which the short tag is deleted by exploiting the same PAM as  
278 in the first step but a different protospacer sequence (termed as the PAM-tag-protospacer) and  
279 the provision of a donor sequence which lacks the tag but contains the desired insertion  
280 sequence (Fig 4A). The success rate for the first and second round editing for 8-bp insertion in  
281 *mexT* is found to be 8/8 and 5/8 (Fig 4B and 4C). This In-Del strategy presumably allows any  
282 type of non-lethal genetic manipulations regardless of PAM limitation.

283 The resulting mutant is designated as *mexT*<sup>PAO1</sup>. As expected, both transcription of *mexEF* and  
284 the MICs of LVX and CIP in the *mexT*<sup>PAO1</sup> cells is reduced comparing with the WT PA154197  
285 (Fig 3C, Fig 2, S2 Table), confirming that the *nfxC* type mutation (8-bp deletion in *mexT*) is  
286 responsible for the over-expression of *mexEF-oprN* and contributes to FQ resistance in  
287 PA154197. Consistent with the previous report of the *nfxC* type resistant mutation, the reverse  
288 mutation *mexT*<sup>PAO1</sup> also leads to a 3-fold higher transcription of *oprD* than the PA154197 parent  
289 (Fig 3C), which encodes a porin protein facilitating the diffusion of carbapenems antibiotics  
290 (especially IPM), and an increased susceptibility to IPM in PA154197 (Fig 2 and S4 Fig).

291 Together, these results indicate that PA154197 may derive from a *nfxC* type resistant strain  
292 with acquired resistance to fluoroquinolones and tolerance to IPM (breaking point of IPM is  
293 4). A two-component system ParSR is also known to be involved in regulating *mexEF-oprN*  
294 [45]. A nonsynonymous nucleotide substitution G1193A is identified in PA154197 *parS* (S1  
295 Table), However, reverse mutation in this gene does not reveal any susceptibility changes (S2  
296 Table), suggesting this mutation does not contribute to the antibiotic resistance development in  
297 PA154197.

298

299 **Mutations in the essential gene *gyrA* constitute the third fluoroquinolone resistance**  
300 **determinant in PA154197.**

301 Although  $\Delta mexB \Delta mexF$  leads to a dramatic decrease (32 fold) in MICs of the fluoroquinolones  
302 LVX (32 to 1) and CIP (16 to 0.5), the strain still displays a lower susceptibility to these two  
303 antibiotics than PAO1 (MIC of both LVX and CIP are 0.25), suggesting the presence of  
304 additional FQ resistance determinants in PA154197. A well-studied T248C substitution  
305 (corresponding to T83I) in the quinolone resistance determining region (QRDR) which  
306 abolishes (fluoro)quinolone binding [46] is identified in the PA154197 DNA gyrase gene *gyrA*  
307 (S6C Fig). To verify its role in the high FQ resistance of PA154197 and interaction with the  
308 other two FQ resistance determinants identified, we employ the two-step In-Del strategy  
309 described for the 8-bp insertion in *mexT* to replace the essential gene *gyrA* in PA154197 with  
310 that from PAO1, generating *gyrA*<sup>PAO1</sup> (S8 Fig). It is found that this gene replacement leads to  
311 8- and 4-fold decrease in the MICs of LVX and CIP, respectively, which is greater than that of  
312  $\Delta mexB$  or  $\Delta mexF$  but not to the susceptible level of PAO1 (Fig 2 and S2 Table), suggesting  
313 that the target (*gyrA*) mutation also actively contributes to the FQ resistance in PA154197 and  
314 to a greater extent than drug efflux by MexAB-OprM or MexEF-OprN, but it does not mask  
315 the contribution of drug efflux.

316

317 **Exquisite resistance synergy shapes the MDR profile in PA154197.**

318 Previous investigations of resistance mechanisms by reconstitution in the laboratory model  
319 strains [10, 38] is often incapable of revealing the relative contribution and synergy of multiple,  
320 different resistance determinants owing to its susceptible strain background. The clinical MDR  
321 strain PA154197 provides a paradigm to investigate these interactions. We first construct a  
322 series of single, double and triple reverse mutations using the efficient editing technique  
323 developed and examine the MIC of various antibiotics and antimicrobial agents in these strains  
324 (Fig 2 and S2 Table). Our data above have shown that both drug efflux by the over-produced  
325 MexAB-OprM and MexEF-OprN pumps and the *gyrA* target mutation contribute to FQ  
326 resistance in PA154197 with *gyrA* mutations contributing to a greater extent of resistance than  
327 drug efflux. Reverse of all three determinants (*gyrA*<sup>PAO1</sup> *mexR*<sup>PAO1</sup> *mexT*<sup>PAO1</sup> strain) leads to  
328 the complete loss of resistance to LVX and CIP, and an overall drug susceptibility in the strain  
329 similar to PAO1, indicating these are the key resistant determinants of the MDR PA154197.  
330 FICI values (0.156 for LVX and 0.047 for CIP) show that all three determinants synergize the  
331 resistance to these two antipseudomonal FQs. Interestingly, MICs in the series of mutants  
332 which harbour variable expression levels of efflux systems, i.e. over-production in the  
333 PA154197 parent, basal level production in the strains of *mexR*<sup>PAO1</sup> and *mexT*<sup>PAO1</sup>, and no  
334 production in the strains of  $\Delta$ *mexB* and  $\Delta$ *mexF*, reveals subtle differences of resistance  
335 mechanisms between the two different FQ antibiotics by the interplay of the same set of  
336 resistant determinants. For instance, while obvious and extensive synergy is observed in every  
337 two combinations of *gyrA* mutation, MexAB over-production, and MexEF over-production for  
338 CIP resistance, synergy between target (*gyrA*) mutation and drug efflux to confer LVX  
339 resistance is observed when both the MexAB and MexEF pumps are over-produced as  
340 evidenced by the FICI values calculated for LVX resistance in

341 *gyrA*<sup>PAO1</sup>*mexR*<sup>PAO1</sup>*mexF*<sup>PAO1</sup> (0.156, synergy), *gyrA*<sup>PAO1</sup>*mexR*<sup>PAO1</sup> (1.125, indifference), and  
342 *gyrA*<sup>PAO1</sup>*mexT*<sup>PAO1</sup> (1.125, indifference) (Fig 2). The drug target (*gyrA*) mutation dominates  
343 the LVX resistance when only one pump is over-produced.

344 In addition to FQs, over-production of the MexAB-OprM and MexEF-OprN pumps also  
345 synergize the resistance to the non-antipseudomonal antibiotics trimethoprim (TMP) and  
346 chloramphenicol (CHL) with an FICI value of 0.094 and 0.063, respectively. Resistance to  
347 antipseudomonal  $\beta$ -lactams including the penicillin- $\beta$ -lactamase inhibitor combination is  
348 almost exclusively dependent on the activity of the MexAB-OprM pump in PA154197.

349 Although mediated by the same resistance determinant, the efflux efficiency of different  $\beta$ -  
350 lactams by the same MexAB-OprM pump differs, with a greater extrusion efficiency observed  
351 for penicillins (CAR), monobactams (ATM), and penicillin- $\beta$ -lactamase inhibitor  
352 combinations (TZP) than for cephalosporins (CAZ) and carbapenems (MEM) (Fig 2 and S3  
353 Table). Notably, MICs of different  $\beta$ -lactams in *mexR*<sup>PAO1</sup> relative to that in  $\Delta$ *mexB* cells which  
354 reflect the efflux capacity of basal expression of MexAB-OprM (as the level in PAO1) reveals  
355 its high capacity of expelling penicillins (CAR) substrate (64 fold) and causing its resistance  
356 (S3 Table). MICs in the WT PA154197 relative to isogenic *mexR*<sup>PAO1</sup> cells which reflects the  
357 efflux capacity contributed by over-production of MexAB-OprM reveals its extraordinary  
358 capacity of all  $\beta$ -lactams with the greatest extent of resistance enhancement observed in the  
359 case of monobactams ATM (16 fold) (S3 Table). The observed FQ resistance by MexAB-  
360 OprM is also contributed by its over-production (S3 Table). Combining these, a rather complete  
361 substrates profile of the two efflux pumps with relative expel efficiencies in the genetic  
362 background of the MDR strain PA154197 is mapped (Fig 5). This information not only  
363 advances our understanding of the relative contributions of resistance determinants and their  
364 interplay in the clinically isolated MDR strain PA154197 but also has implications in the  
365 clinical treatment of drug resistant infections.

366

367 **Lacking of collateral sensitivity in PA154197.**

368 It was proposed that resistance acquisition often leads to evolutionary trade-offs in resistant  
369 strains, i.e. evolved resistance is costly in the absence of the drugs and leads to growth  
370 deficiencies relative to the susceptible ancestor; or resistance mutations to one class of  
371 antibiotics may exacerbate susceptibility against others, causing a phenomenon called  
372 collateral sensitivity. Collateral sensitivity was first described as early as 1950s [47] and was  
373 recently verified in a series of laboratory evolved resistant strains of *E. coli* and *P. aeruginosa*  
374 [48-50]. It was proposed that collateral sensitivity is a common phenomenon in AMR strains  
375 and can be exploited to eradicate clinical resistant strains or reduce resistance development by  
376 programming the drug pairs that produce reciprocal collateral sensitivity [39, 51, 52]. However,  
377 a recent study reported the lack of collateral sensitivity in clinical *P. aeruginosa* isolates from  
378 the cystic fibrosis (CF) patients [53]. But the study did not investigate relative changes in strain  
379 susceptibility due to the lack of appropriate baseline controls. The series of strains we  
380 constructed which display variable level of resistance in the same genetic background of an  
381 MDR strain allows investigating this phenomenon in the context of clinical MDR (a strain from  
382 a blood stream infection). To address this, we measure the MICs of the two classes of  
383 antibiotics the MDR strain PA154197 displays susceptibility: aminoglycosides (streptomycin  
384 and gentamycin) and non-ribosomal peptides (Polymyxin B and colistin) and examine whether  
385 the MDR PA154197 is more susceptible to these antibiotics than the series of isogenic, less-  
386 resistant “ancestor” strains. However, it is shown that the strains containing various one or two  
387 resistant determinants display the same level of susceptibility to aminoglycosides and  
388 polymyxins with the WT which contains all three key resistant determinants (S2 Table).  
389 Similar result is obtained in the susceptibility to another class of antibiotic which usually is not  
390 used to treat *P. aeruginosa* infections, fosfomycin (FOF). These results suggest that unlike



391 those laboratory evolved strains with resistance to one or two specific classes of antibiotics,  
392 clinical multidrug resistant strains perhaps have evolved compensatory mutations prevailing  
393 the evolutionary trade-off of collateral sensitivity, rendering the treatment of MDR clinical  
394 strains especially challenging.

395

## 396 **Discussion**

397 Emergence of resistance to multiple antimicrobial agents in pathogenic bacteria has become a  
398 significant global public health threat as there are fewer, or even sometimes no, effective  
399 antimicrobial agents to treat the infections caused by these bacteria. The MDR international  
400 high-risk clones of *P. aeruginosa* are especially challenging in therapeutics owing to their  
401 extraordinary drug resistance and rapid dissemination in hospitals worldwide [54-56]. Previous  
402 molecular epidemic analyses have largely focused on identification of genetic variations in  
403 resistant isolates in comparison with the model strain PAO1 [57]. To our knowledge, there has  
404 been no systematic, functional genetics investigations of resistance development characterized  
405 directly in the native genetic background of clinical MDR isolates. In this study, we report the  
406 first single-plasmid-mediated, one-step genome editing technique applicable in the native  
407 CRISPR-Cas containing, clinical *P. aeruginosa* strains, and its exploitation in MDR  
408 characterization which provides new insight into the interplay and collateral effect of resistant  
409 mutations in shaping the clinically significant MDR.

410 In comparison with a recently reported heterologous Cas9-based genome editing method which  
411 requires successive transformation of two editing plasmids [35], and the conventional two-step  
412 allelic exchange method [58] which takes more than two weeks to construct a mutant with an  
413 undesirable FLP site permanently remained in the edited site, our method using a single  
414 plasmid to achieve editing in one-step represents a more efficient and clean genome editing  
415 technique which can be completed within one week, i.e. 3-4 days for constructing the editing

416 plasmid and 2-3 days for the luminescence-assisted selection and verification. The two-step In-  
417 Del strategy further developed to circumvent the limitation of poorly targeted genomic loci  
418 principally allows us to conduct any non-lethal genetic manipulation in the bacterial genome  
419 (Fig 6), greatly expanding and accelerating the molecular characterizations of the CRISPR-  
420 containing, MDR *P. aeruginosa* isolates. The methodology should be readily extended to other  
421 clinically significant pathogens, such as *Acinetobacter baumannii* and *Klebsiella spp.* to  
422 facilitate resistance characterization and management in these species.

423 Employing this powerful and efficient genome editing methodology, we not only verified the  
424 key resistant determinants but also revealed their relative contribution and interplay in shaping  
425 the MDR of the clinical strain PA154197 which are unable to be elucidated by reconstitution  
426 in the susceptible model strains. The G226T substitution in *mexR* is a newly identified point  
427 mutation occurred in PA154197 that leads to the de-repression of *mexAB-oprM*. Three resistant  
428 mutations are found to synergize FQ resistance, and mutations in *gyrA* elicit a greater extent of  
429 resistance than over-production of MexAB-OprM or MexEF-OprN. We speculate that the  
430 G226T mutation in *mexR* (leading to over-production of MexAB-OprM) and the target (*gyrA*)  
431 mutations were acquired after the *nfxC* type 8-bp deletion in *mexT* (leading to the over-  
432 production of MexEF-OprN and reduced production of OprD) as i) the *nfxC* type resistant  
433 strains often contain an impaired *mexAB-oprM* system and additional mutations are presumably  
434 needed to achieve simultaneous over-production of both MexEF-OprN and MexAB-OprM  
435 pumps; and ii) the contribution of drug efflux (by the MexEF-OprN) to resistance development  
436 is not only due to its direct expelling structurally diverse antibiotics but also the capability of  
437 driving the acquisition of additional, specific resistance mechanisms by lowering intracellular  
438 antibiotic concentration and promoting mutation accumulation [14, 59].

439 Lastly, we investigated the relative contributions, synergy, and collateral effects of different  
440 resistant determinants in conferring the resistance to different classes of antibiotics which

441 should have valuable implications in the treatment of clinical resistant strains. For instance,  
442 given the substantial role of drug efflux in causing resistance to CAR, ATM, LVX, and CIP,  
443 supplement of pump inhibitors with these antibiotics can conceivably improve the treatment of  
444 infections caused by the MDR strain. Notably, studies carried out in a susceptible reference *P.*  
445 *aeruginosa* strain and in *E. coli* showed no synergy between MexAB-OprM and MexEF-OprN  
446 in expelling FQs [10]. In contrast to the observation in the laboratory evolved strains [39], no  
447 collateral sensitivity and obvious evolution trade-offs such as growth defect in the absence of  
448 antibiotics is observed in the clinical MDR strain PA154197. This discrepancy is likely due to  
449 the genetic background of the clinical MDR strains and their extraordinary pathoadaptive  
450 capabilities remain elucidated. These findings underlie the importance of investigating  
451 resistance development in the native genetic background of resistant isolates.

452 Although genome sequencing and comparative genomics can identify the genetic variations in  
453 resistance genes, whether and to what extent these variations contribute to the resistance  
454 phenotype cannot be disclosed merely by genomic and transcriptome analyses. For instance,  
455 we found that over-expression (~40-fold higher than in PAO1) of the efflux gene *mexH* and  
456 nucleotide substitution in *parS* does not contribute to the drug resistance in PA154197. These  
457 results suggest that not all genetic variations identified in resistance genes lead to the  
458 development of antibiotic resistance, further highlighting the importance of the targeted  
459 functional genomics investigations directly in the clinically isolated resistant strains.

460

## 461 **Material and methods**

### 462 **Bacterial strains, culture conditions.**

463 All the bacterial strains used and constructed in this study are listed in S3 Table. *E. coli* DH5 $\alpha$   
464 is used for plasmid construction and is usually cultured at 37°C in Luria-Bertani (LB) broth or  
465 on the LB agar plate supplemented with 20  $\mu$ g/ml Kanamycin (KAN). *P. aeruginosa*

466 PA154197 was isolated from the Queen Mary Hospital in Hong Kong, China [26]. PA154197  
467 and its derivatives were selected in LB (broth or agar) with 500 µg/ml KAN at 37°C.

468

#### 469 **Plasmid construction.**

470 All the plasmids constructed and used in this study are listed in S4 Table. Mini-CRISPR  
471 element consisting of two repeats flanking the PAM-protospacer was synthesized by BGI  
472 (Shenzhen, China). PCR was performed using the iProof™ High-Fidelity DNA Polymerase  
473 (Bio-Rad, USA). Mini-CRISPR elements and plasmid pAY5211 were digested using the  
474 restriction enzymes KpnI and BamHI (NEB, USA) and ligated using the Quick Ligation Kit  
475 (NEB, USA) to generate the targeting plasmid. Donor sequences which typically contain 500-  
476 bp upstream and 500-bp downstream of the editing sites were amplified by PCR and ligated  
477 into the linearized targeting plasmid (digested by XhoI (NEB, USA)) using the ClonExpress  
478 One Step Cloning Kit (Vazyme, China). All the constructed plasmids were verified by DNA  
479 sequencing (BGI, China).

480

#### 481 **Transformation of PA154197.**

482 Electrocompetent PA154197 cells were prepared by firstly inoculating a fresh colony in LB  
483 broth and grown at 37°C overnight with 220-rpm agitation. Following subculture into 50 ml  
484 fresh LB broth and growing to  $OD_{600} = 0.5$ , cells were collected by centrifugation and washed  
485 three times with cold autoclaved Milli-Q H<sub>2</sub>O. The resulting cells were resuspended into 1 ml  
486 Milli-Q H<sub>2</sub>O. 100 µl electrocompetent PA154197 cells were then mixed with 1 µg editing  
487 plasmid and subject to electroporation (BTX, USA). 1 ml cold LB broth was added to recover  
488 the cells. Following culturing at 37°C for 1 h with agitation, cells were pelleted and  
489 resuspended in 100 µl LB for spreading (LB+KAN500). Transformants colonies were obtained  
490 after incubation at 37°C for 16-20 h.

491

492 **Mutant screening and verification.**

493 Colonies were firstly subjected to luminescence screening using the Synergy HTX Plate Reader  
494 (Bio Tek, USA). Colonies with high luminescent intensity were further verified by colony PCR  
495 using Taq DNA polymerase (Thermal Scientific, USA) with indicated primers and DNA  
496 sequencing (BGI, China). Sequencing results were visualized using DNA sequencing software  
497 Chromas (Technelysium Pty Ltd, Australia)

498

499 **Curing of editing plasmid.**

500 *P. aeruginosa* cells underwent one round of editing was streaked onto the LB agar plate and  
501 incubated at 37°C overnight. Single colony was selected and the curing was verified by the  
502 failure of growth in LB with 100 µg/ml KAN.

503

504 **Minimum inhibitory concentration (MIC) measurement.**

505 MIC was measured following the standard protocol of ASM with slight modification [60]. A  
506 single fresh colony of PA154197 was inoculated in LB medium overnight at 37°C with  
507 agitation. Overnight culture was then diluted to cell density of 10<sup>5</sup>/ml, and 200 µl of the cells  
508 were distributed to each well of the 96-well plate. Antibiotics were then added with final  
509 concentrations ranging from 0.25 to 128 µg/ml. Plates were incubated at 37°C for 16-20 h and  
510 MIC value was determined by absorbance at 600 nm.

511

512 **Reverse transcription (RT)-quantitative PCR (qPCR).**

513 Bacterial cells from overnight culture were harvested by centrifugation at 4°C. Total RNA was  
514 extracted using RNeasy Mini Kit (Qiagen, Germany) according to the manufacturer's  
515 instruction. Reverse transcription was performed using PrimeScript RT reagent Kit (Takara,

516 Japan). qPCR was performed using specific primers and the SYBR Green PCR master mix  
517 (Applied Biosystems, USA) in a 20 µl reaction system. The reaction was performed in ABI  
518 StepOnePlus real time PCR system with *recA* and *clpX* as reference genes to normalize the  
519 relative expression of the target genes. The results were expressed as fold change of the  
520 expression of target genes, and results were presented as the mean of three independent  
521 biological isolates.

522

### 523 **Disk diffusion assay.**

524 20 µl overnight culture as described above was mixed with 5 ml melted LB top agar (0.75 %)  
525 and poured on a LB agar plate. After the agar was solidified, round filter paper disks were  
526 placed. 5µl antibiotic solution (2 mg/ml) was added to the centre of the paper disks. The plates  
527 were incubated at 37°C for 16 h.

528

### 529 **Fractional inhibitory concentration index (FICI) determination.**

530 Synergy of mutation combinations was determined using the FICI method [39]. The MIC of  
531 the mutant with combined mutations is divided by the MICs of the mutants with single mutation,  
532 yielding the fractional contribution of each mutation in the combination. Interaction of different  
533 mutations (A, B, C) is scored using the following formula:  $FICI_{(ABC)} = MIC_{(ABC)} / (MIC_{(A)} +$   
534  $MIC_{(ABC)} / MIC_{(B)} + MIC_{(ABC)} / MIC_{(C)}).$

535

### 536 **Acknowledgements**

537 We thank Prof. Susumu Yoshizawa and Prof. Kazuhiro Kogure (Both from the University of  
538 Tokyo) for sharing the ocean-100 strain. We appreciate Dr. Xin Deng (Department of  
539 Biomedical Sciences, City University of Hong Kong) for the pMS402 vector and Dr. Zhaoxun

540 Liang (School of Biological Sciences, Nanyan Technological University, Singapore) for his  
541 advice on the manuscript writing.

542

## 543 **References**

- 544 1. Oliver A, Mulet X, López-Causapé C, Juan C. The increasing threat of *Pseudomonas*  
545 *aeruginosa* high-risk clones. Drug Resist Updates. 2015;21:41-59. doi:  
546 10.1016/j.drug.2015.08.002 PMID: 26304792
- 547 2. Stover CK, Pham XQ, Erwin A, Mizoguchi S, Warrener P, Hickey M, et al. Complete  
548 genome sequence of *Pseudomonas aeruginosa* PAO1, an opportunistic pathogen. Nature.  
549 2000;406(6799):959-964. doi: 10.1038/35023079 PMID: 10984043
- 550 3. Poole K. *Pseudomonas aeruginosa*: resistance to the max. Front Microbiol. 2011;2:65.  
551 doi:10.3389/fmicb.2011.00065 PMID: 21747788
- 552 4. Santajit S, Indrawattana N. Mechanisms of antimicrobial resistance in ESKAPE pathogens.  
553 BioMed Res Int. 2016;2016: 2475067. doi: 10.1155/2016/2475067 PMID: 27274985
- 554 5. Magiorakos AP, Srinivasan A, Carey R, Carmeli Y, Falagas M, Giske C, et al. Multidrug-  
555 resistant, extensively drug-resistant and pandrug-resistant bacteria: an international expert  
556 proposal for interim standard definitions for acquired resistance. Clin Microbiol Infect.  
557 2012;18(3):268-281. doi: 10.1111/j.1469-0691.2011.03570.x PMID: 21793988
- 558 6. Hocquet D, Berthelot P, Roussel-Delvallez M, Favre R, Jeannot K, Bajolet O, et al.  
559 *Pseudomonas aeruginosa* may accumulate drug resistance mechanisms without losing its  
560 ability to cause bloodstream infections. Antimicrob Agents Chemother. 2007;51(10):3531-  
561 3536. doi: 10.1128/AAC.00503-07 PMID: 17682106
- 562 7. Cabot G, Ocampo-Sosa AA, Dominguez MA, Gago JF, Juan C, Tubau F, et al. Genetic  
563 markers of widespread extensively drug-resistant *Pseudomonas aeruginosa* high-risk

- 564 clones. Antimicrob Agents Chemother. 2012;56(12):6349-6357. doi:  
565 10.1128/AAC.01388-12 PMID: 23045355
- 566 8. Hocquet D, Bertrand X, Kohler T, Talon D, Plesiat P. Genetic and phenotypic variations  
567 of a resistant *Pseudomonas aeruginosa* epidemic clone. Antimicrob Agents Chemother.  
568 2003;47(6):1887-1894. doi: 10.1128/AAC.47.6.1887-1894.2003 PMID: 12760863
- 569 9. Köhler T, Epp SF, Curty LK, Pechère J-C. Characterization of MexT, the regulator of the  
570 MexE-MexF-OprN multidrug efflux system of *Pseudomonas aeruginosa*. J Bacteriol.  
571 1999;181(20):6300-6305. PMID: 10515918
- 572 10. Bruchmann S, Dötsch A, Nouri B, Chaberny IF, Häussler S. Quantitative contribution of  
573 target alteration and decreased drug accumulation to *Pseudomonas aeruginosa*  
574 fluoroquinolone resistance. Antimicrob Agents Chemother. 2012;57(3):1361-1368. doi:  
575 10.1128/AAC.01581-12 PMID: 23274661
- 576 11. Riera E, Cabot G, Mulet X, Garcia-Castillo M, del Campo R, Juan C, et al. *Pseudomonas*  
577 *aeruginosa* carbapenem resistance mechanisms in Spain: impact on the activity of  
578 imipenem, meropenem and doripenem. J Antimicrob Chemother. 2011;66(9):2022-2027.  
579 doi: 10.1093/jac/dkr232 PMID: 21653605.
- 580 12. Llanes C, Hocquet D, Vogne C, Benali-Baitich D, Neuwirth C, Plesiat P. Clinical strains  
581 of *Pseudomonas aeruginosa* overproducing MexAB-OprM and MexXY efflux pumps  
582 simultaneously. Antimicrob Agents Chemother. 2004;48(5):1797-802. doi:  
583 10.1128/AAC.48.5.1797-1802.2004 PMID: 15105137
- 584 13. Horna G, Lopez M, Guerra H, Saenz Y, Ruiz J. Interplay between MexAB-OprM and  
585 MexEF-OprN in clinical isolates of *Pseudomonas aeruginosa*. Sci Rep. 2018;8(1):16463.  
586 doi: 10.1038/s41598-018-34694-z PMID: 30405166



- 587 14. Li XZ, Plesiat P, Nikaido H. The challenge of efflux-mediated antibiotic resistance in  
588 Gram-negative bacteria. *Clin Microbiol Rev.* 2015;28(2):337-418. doi:  
589 10.1128/CMR.00117-14 PMID: 25788514
- 590 15. Lee A, Mao WM, Warren MS, Mistry A, Hoshino K, Okumura R, et al. Interplay between  
591 efflux pumps may provide either additive or multiplicative effects on drug resistance. *J*  
592 *Bacteriol.* 2000;182(11):3142-3150. doi:10.1128/jb.182.11.3142-3150.2000 PMID:  
593 10809693
- 594 16. Mulet X, Moyá B, Juan C, Macià MD, Pérez JL, Blázquez J, et al. Antagonistic interactions  
595 of *Pseudomonas aeruginosa* antibiotic resistance mechanisms in planktonic but not biofilm  
596 growth. *Antimicrob Agents Chemother.* 2011;55(10):4560-4568. doi:  
597 10.1128/AAC.00519-11 PMID: 21807976
- 598 17. Maseda H, Sawada I, Saito K, Uchiyama H, Nakae T, Nomura NJAa, et al. Enhancement  
599 of the *mexAB-oprM* efflux pump expression by a quorum-sensing autoinducer and its  
600 cancellation by a regulator, MexT, of the *mexEF-oprN* efflux pump operon in  
601 *Pseudomonas aeruginosa*. *Antimicrob Agents Chemother.* 2004;48(4):1320-1328. doi:  
602 10.1128/AAC.48.4.1320-1328.2004 PMID: 15047536
- 603 18. Vogwill T, Kojadinovic M, MacLean RC. Epistasis between antibiotic resistance mutations  
604 and genetic background shape the fitness effect of resistance across species of  
605 *Pseudomonas*. *Proc Biol Sci.* 2016;283(1830). doi: 10.1098/rspb.2016.0151 PMID:  
606 27170722
- 607 19. de Sousa JM, Balbontín R, Durão P, Gordo I. Multidrug-resistant bacteria compensate for  
608 the epistasis between resistances. *PLoS Biol.* 2017;15(4):e2001741. doi:  
609 10.1371/journal.pbio.2001741 PMID: 28419091

- 610 20. Vogwill T, Kojadinovic M, Furio V, MacLean RC. Testing the role of genetic background  
611 in parallel evolution using the comparative experimental evolution of antibiotic resistance.  
612 Mol Biol Evol. 2014;31(12):3314-23. doi: 10.1093/molbev/msu262 PMID: 25228081
- 613 21. van Belkum A, Soriaga LB, LaFave MC, Akella S, Veyrieras J-B, Barbu EM, et al.  
614 Phylogenetic distribution of CRISPR-Cas systems in antibiotic-resistant *Pseudomonas*  
615 *aeruginosa*. MBio. 2015;6(6):e01796-15. doi: 10.1128/mBio.01796-15 PMID: 26604259
- 616 22. Cheng F, Gong L, Zhao D, Yang H, Zhou J, Li M, et al. Harnessing the native type IB  
617 CRISPR-Cas for genome editing in a polyploid archaeon. J Genet Genomics.  
618 2017;44(11):541-548. doi: 10.1016/j.jgg.2017.09.010 PMID: 29169919
- 619 23. Zhang J, Zong W, Hong W, Zhang Z-T, Wang Y. Exploiting endogenous CRISPR-Cas  
620 system for multiplex genome editing in *Clostridium tyrobutyricum* and engineer the strain  
621 for high-level butanol production. Metab Eng. 2018;47:49-59. doi:  
622 10.1016/j.ymben.2018.03.007 PMID: 29530750
- 623 24. Li Y, Pan S, Zhang Y, Ren M, Feng M, Peng N, et al. Harnessing Type I and Type III  
624 CRISPR-Cas systems for genome editing. Nucleic Acids Res. 2015;44(4):e34-e. doi:  
625 10.1093/nar/gkv1044 PMID: 26467477
- 626 25. Pyne ME, Bruder MR, Moo-Young M, Chung DA, Chou CP. Harnessing heterologous and  
627 endogenous CRISPR-Cas machineries for efficient markerless genome editing in  
628 *Clostridium*. Sci Rep. 2016;6:25666. doi: 10.1038/srep25666 PMID: 27157668
- 629 26. Cao H, Xia T, Li Y, Bougouffa S, Lo YK, Bajic VB, et al. A multidrug resistant clinical *P.*  
630 *aeruginosa* isolate in the MLST550 clonal complex: uncoupled quorum sensing modulates  
631 the interplay of virulence and resistance. bioRxiv. 2018. doi:  
632 <https://doi.org/10.1101/415000>

- 633 27. Yonezawa M, Takahata M, Matsubara N, Watanabe Y, Narita H. DNA gyrase *gyrA*  
634 mutations in quinolone-resistant clinical isolates of *Pseudomonas aeruginosa*. *Antimicrob*  
635 *Agents Chemother.* 1995;39(9):1970-1972. doi: 10.1128/AAC.39.9.1970 PMID: 8540700
- 636 28. Juan C, Maciá MD, Gutiérrez O, Vidal C, Pérez JL, Oliver A. Molecular mechanisms of  $\beta$ -  
637 lactam resistance mediated by AmpC hyperproduction in *Pseudomonas aeruginosa* clinical  
638 strains. *Antimicrob Agents Chemother.* 2005;49(11):4733-4738. doi:  
639 10.1128/AAC.49.11.4733-4738.2005 PMID: 16251318
- 640 29. Richter C, Gristwood T, Clulow JS, Fineran PC. In vivo protein interactions and complex  
641 formation in the *Pectobacterium atrosepticum* subtype IF CRISPR/Cas System. *PLoS One.*  
642 2012;7(12):e49549. doi: 10.1371/journal.pone.0049549 PMID: 23226499
- 643 30. Cady KC, Bondy-Denomy J, Heussler GE, Davidson AR, O'Toole GA. The CRISPR/Cas  
644 adaptive immune system of *Pseudomonas aeruginosa* mediates resistance to naturally  
645 occurring and engineered phages. *J Bacteriol.* 2012;194(21):5728-5738. doi:  
646 10.1128/JB.01184-12 PMID: 22885297
- 647 31. Leenay RT, Beisel CL. Deciphering, communicating, and engineering the CRISPR PAM.  
648 *J Mol Biol.* 2017;429(2):177-191. doi: 10.1016/j.jmb.2016.11.024 PMID: 27916599
- 649 32. Olsen RH, DeBusscher G, McCombie WR. Development of broad-host-range vectors and  
650 gene banks: self-cloning of the *Pseudomonas aeruginosa* PAO chromosome. *J Bacteriol.*  
651 1982;150(1):60-69. PMID: 6277872
- 652 33. Shah NCM. Construction and development of bioluminescent *Pseudomonas aeruginosa*  
653 strains; application in biosensors for preservative efficacy testing. PhD Thesis, University  
654 of Hertfordshire. 2014. Available from: <https://uhra.herts.ac.uk/handle/2299/15592>
- 655 34. Xu L, Chen H, Hu XH, Zhang RM, Zhang Z, Luo ZW. Average gene length is highly  
656 conserved in prokaryotes and eukaryotes and diverges only between the two kingdoms.  
657 *Mol Biol Evol.* 2006;23(6):1107-1108. doi: 10.1093/molbev/msk019 PMID: 16611645

- 658 35. Chen W, Zhang Y, Zhang Y, Pi Y, Gu T, Song L, et al. CRISPR/Cas9-based genome  
659 editing in *Pseudomonas aeruginosa* and cytidine deaminase-mediated base editing in  
660 *Pseudomonas* species. *iScience*. 2018;6:222-231. doi: 10.1016/j.isci.2018.07.024 PMID:  
661 30240613
- 662 36. Chen W, Zhang Y, Yeo W-S, Bae T, Ji Q. Rapid and efficient genome editing in  
663 *Staphylococcus aureus* by using an engineered CRISPR/Cas9 system. *J Am Chem Soc*.  
664 2017;139(10):3790-3795. doi: 10.1021/jacs.6b13317 PMID: 28218837
- 665 37. Kumagai Y, Yoshizawa S, Nakamura K, Ogura Y, Hayashi T, Kogure K. Complete and  
666 draft genome sequences of eight oceanic *Pseudomonas aeruginosa* strains. *Genome*  
667 *Announc*. 2017;5(44):e01255-17. doi: 10.1128/genomeA.01255-17 PMID: 29097479
- 668 38. Köhler T, Michéa-Hamzehpour M, Henze U, Gotoh N, Kocjancic Curty L, Pechère JC.  
669 Characterization of MexE–MexF–OprN, a positively regulated multidrug efflux system of  
670 *Pseudomonas aeruginosa*. *Mol Microbiol*. 1997;23(2):345-354. PMID: 9044268
- 671 39. Gonzales PR, Pesesky MW, Bouley R, Ballard A, Biddy BA, Suckow MA, et al.  
672 Synergistic, collaterally sensitive  $\beta$ -lactam combinations suppress resistance in MRSA. *Nat*  
673 *Chem Biol*. 2015;11(11):855-861. doi: 10.1038/nchembio.1911 PMID: 26368589
- 674 40. Sánchez P, Rojo F, Martínez JL. Transcriptional regulation of *mexR*, the repressor of  
675 *Pseudomonas aeruginosa mexAB-oprM* multidrug efflux pump. *FEMS Microbiol Lett*.  
676 2002;207(1):63-68. doi: 10.1111/j.1574-6968.2002.tb11029.x PMID: 11886752
- 677 41. Adewoye L, Sutherland A, Srikumar R, Poole K. The *mexR* repressor of the *mexAB-oprM*  
678 multidrug efflux operon in *Pseudomonas aeruginosa*: characterization of mutations  
679 compromising activity. *J Bacteriol*. 2002;184(15):4308-4312. doi:  
680 10.1128/JB.184.15.4308-4312.2002 PMID: 12107151
- 681 42. Saito K, Yoneyama H, Nakae T. *nalB*-type mutations causing the overexpression of the  
682 MexAB-OprM efflux pump are located in the *mexR* gene of the *Pseudomonas aeruginosa*

- 683 chromosome. FEMS Microbiol Lett. 1999;179(1):67-72. doi: 10.1111/j.1574-  
684 6968.1999.tb08709.x PMID: 10481088
- 685 43. Maseda H, Saito K, Nakajima A, Nakae T. Variation of the *mexT* gene, a regulator of the  
686 MexEF-OprN efflux pump expression in wild-type strains of *Pseudomonas aeruginosa*.  
687 FEMS Microbiol Lett. 2000;192(1):107-112. doi: 10.1111/j.1574-6968.2000.tb09367.x  
688 PMID: 11040437
- 689 44. Linares JF, López JA, Camafeita E, Albar JP, Rojo F, Martínez JLJJob. Overexpression of  
690 the multidrug efflux pumps MexCD-OprJ and MexEF-OprN is associated with a reduction  
691 of type III secretion in *Pseudomonas aeruginosa*. J Bacteriol. 2005;187(4):1384-1391. doi:  
692 10.1128/JB.187.4.1384-1391.2005 PMID: 15687203
- 693 45. Wang D, Seeve C, Pierson LS, Pierson EA. Transcriptome profiling reveals links between  
694 ParS/ParR, MexEF-OprN, and quorum sensing in the regulation of adaptation and  
695 virulence in *Pseudomonas aeruginosa*. BMC Genomics. 2013;14:618. doi: 10.1186/1471-  
696 2164-14-618 PMID: 24034668
- 697 46. Varughese LR, Rajpoot M, Goyal S, Mehra R, Chhokar V, Beniwal V. Analytical profiling  
698 of mutations in quinolone resistance determining region of *gyrA* gene among UPEC. PloS  
699 one. 2018;13(1):e0190729. doi: 10.1371/journal.pone.0190729 PMID: 29300775
- 700 47. Szybalski W, Bryson VJJob. Genetic studies on microbial cross resistance to toxic agents  
701 i.: cross resistance of *Escherichia coli* to fifteen antibiotics. J Bacteriol. 1952;64(4):489-  
702 499. PMID: 12999676
- 703 48. Pál C, Papp B, Lázár VJTim. Collateral sensitivity of antibiotic-resistant microbes. Trends  
704 Microbiol. 2015;23(7):401-407. doi: 10.1016/j.tim.2015.02.009 PMID: 25818802
- 705 49. Barbosa C, Trebosc V, Kemmer C, Rosenstiel P, Beardmore R, Schulenburg H, et al.  
706 Alternative evolutionary paths to bacterial antibiotic resistance cause distinct collateral

- 707 effects. *Mol Biol Evol.* 2017;34(9):2229-2244. doi: 10.1093/molbev/msx158 PMID:  
708 28541480
- 709 50. Podnecky NL, Fredheim EG, Kloos J, Sørum V, Primicerio R, Roberts AP, et al. Conserved  
710 collateral antibiotic susceptibility networks in diverse clinical strains of *Escherichia coli*.  
711 *Nat Commun.* 2018;9(1):3673. doi: 10.1038/s41467-018-06143-y PMID: 30202004
- 712 51. Wambaugh MA, Shakya VP, Lewis AJ, Mulvey MA, Brown JCS. High-throughput  
713 identification and rational design of synergistic small-molecule pairs for combating and  
714 bypassing antibiotic resistance. *PLoS Biol.* 2017;15(6):e2001644. doi:  
715 10.1371/journal.pbio.2001644 PMID: 28632788
- 716 52. Lázár V, Martins A, Spohn R, Daruka L, Grézal G, Fekete G, et al. Antibiotic-resistant  
717 bacteria show widespread collateral sensitivity to antimicrobial peptides. *Nat Microbiol.*  
718 2018;3(6):718-731. doi: 10.1038/s41564-018-0164-0 PMID: 29795541
- 719 53. Jansen G, Mahrt N, Tueffers L, Barbosa C, Harjes M, Adolph G, et al. Association between  
720 clinical antibiotic resistance and susceptibility of *Pseudomonas* in the cystic fibrosis lung.  
721 *Evol Med Public Health.* 2016;2016(1):182-94. doi: 10.1093/emph/eow016 PMID:  
722 27193199
- 723 54. Breidenstein EB, de la Fuente-Núñez C, Hancock RE. *Pseudomonas aeruginosa*: all roads  
724 lead to resistance. *Trends Microbiol.* 2011;19(8):419-426. doi: 10.1016/j.tim.2011.04.005  
725 PMID: 21664819
- 726 55. Cheng VC, Wong SC, Ho P-L, Yuen K-Y. Strategic measures for the control of surging  
727 antimicrobial resistance in Hong Kong and mainland of China. *Emerg Microbes Infect.*  
728 2016;4(2):e8. doi: 10.1038/emi.2015.8 PMID: 26038766
- 729 56. Wright GD. Antibiotic adjuvants: rescuing antibiotics from resistance. *Trends Microbiol.*  
730 2016;24(11):862-871. doi: 10.1016/j.tim.2016.06.009 PMID: 27430191

- 731 57. Jia B, Raphenya AR, Alcock B, Waglechner N, Guo P, Tsang KK, et al. CARD 2017:  
732 expansion and model-centric curation of the comprehensive antibiotic resistance database.  
733 Nucleic Acids Res. 2016;45(D1):D566-D573. doi: 10.1093/nar/gkw1004 PMID: 27789705
- 734 58. Choi K-H, Schweizer HP. An improved method for rapid generation of unmarked  
735 *Pseudomonas aeruginosa* deletion mutants. BMC Microbiol. 2005;5(1):30. doi:  
736 10.1186/1471-2180-5-30 PMID: 15907219
- 737 59. Sun J, Deng Z, Yan A. Bacterial multidrug efflux pumps: mechanisms, physiology and  
738 pharmacological exploitations. Biochem Biophys Res Commun. 2014;453(2):254-267. doi:  
739 10.1016/j.bbrc.2014.05.090 PMID: 24878531
- 740 60. Coyle MB et al. Manual of Antimicrobial Susceptibility Testing. American Society for  
741 Microbiology; 2005.
- 742
- 743

744 **Figure captions**

745 **Fig 1. Repurposing the functional native CRISPR-Cas system for gene deletion. (A)**

746 Schematic representation of the native type I-F CRISPR-Cas in PA154197. Diamonds and  
747 rectangles indicate the repeat and spacer units of a CRISPR array, respectively. Curved arrows  
748 (in black) above the leader sequence (in brown) indicate the orientation of CRISPR  
749 transcription. The consensus repeat of the two CRISPR arrays differs by one nucleotide (in  
750 red). **(B)** Schematic showing the design of the *mexB*-targeting plasmid (pAY5233) and the  
751 *mexB*-deletion donor. The mini-CRISPR in pAY5233 comprises a 32-bp spacer (in blue)  
752 targeting the *mexB* gene and two flanking repeats (in yellow), and is co-expressed with the  
753 reporter *lux* operon (in green) under the control of the strong promoter *Ptat*. The PAM sequence  
754 is framed. The donor (in pink) consists of sequences upstream (U1) and downstream (D1) of  
755 *mexB*. The *KpnI* and *BamHI* sites are used for mini-CRISPR insertion and the *XhoI* site is used  
756 for one-step cloning of the donor. **(C)** Representative plates showing the transformation  
757 efficiency of the vector control pAY5211, the targeting plasmid pAY5233, and the editing  
758 plasmid pAY5235. **(D)** Design of the *mexB*-deletion plasmid pAY5235 which contains both  
759 the self-targeting CRISPR and the repair donor. **(E)** Eight randomly selected transformants  
760 were subjected to colony PCR to screen for the  $\Delta$ *mexB* mutants (positive clones are highlighted  
761 in red). Primers used in colony PCR (F1/R1) are indicated in panel (B). **(F)** The screened  
762  $\Delta$ *mexB* mutants in (E) were further validated by DNA sequencing.

763

764 **Fig 2. MIC fold-change of various antimicrobial agents in PA154197 isogenic mutants**

765 **and FICI profiling of reverse mutation combinations.** MICs of 12 antimicrobial agents (8  
766 antipseudomonal antibiotics and 4 other antimicrobial agents) were tested in 12 PA154197  
767 isogenic mutants. MIC fold-changes between the wild-type PA154197 and mutants are  
768 expressed by the color key shown (detailed MIC values are shown in S2 Table). FICI profiles



769 of various mutation combinations against different antimicrobial agents are presented. FICI  
770 values below 0.5 which indicates synergy are highlighted in orange.

771

772 **Fig 3. Expression levels of the *mexAB*, *mexEF* and *oprD* genes in PAO1, PA154197 and**  
773 **its isogenic mutants *mexR*<sup>PAO1</sup> *mexT*<sup>PAO1</sup>.** (A) Schematic showing the regulation of *mexAB*-  
774 *oprM*, *mexEF-oprN* and *oprD* in *P. aeruginosa*. MexR represses the expression of *mexAB*-  
775 *oprM*; MexT activates *mexEF-oprN* and represses *oprD*. (B) Transcription alteration of *mexA*  
776 and *mexB* in PA154197 and in PAO1, and in PA154197 and its isogenic *mexR*<sup>PAO1</sup> mutant. (C)  
777 Transcription alteration of *mexE*, *mexF* and *oprD* in PA154197 and in PAO1, and in PA154197  
778 and its isogenic *mexT*<sup>PAO1</sup> mutant.

779

780 **Fig 4. The two-step In-Del editing strategy (taking insertion of 8 bp into *mexT* as an**  
781 **example).** (A) Schematic design of the two-step In-Del method. In the first step, a 32-bp  
782 exogenous DNA sequence (tag, in pink) is introduced to an auxiliary target site (in blue),  
783 between its PAM and protospacer portions. In the second step, a tag-targeting CRISPR, as well  
784 as a tag-lacking donor which contains the desired mutation (8-bp insertion in this case), is  
785 provided to simultaneously remove the exogenous tag and achieve the desired mutation. (B)  
786 Randomly selected luminescence positive colonies from the two steps were subjected to colony  
787 PCR using the primers F2/Seq-R2 (indicated in panel A). Desired mutants are highlighted in  
788 red. (C) Targets in the potential mutants from the two steps were amplified using the primers  
789 Seq-F2/Seq-R2 (indicated in panel A) and validated by DNA sequencing. Representative DNA  
790 sequencing results from the two steps are shown, where the tag sequence is shown in pink.

791

792 **Fig 5. Substrates profile and their relative efflux efficiency by the over-produced MexAB-**  
793 **OprM and MexEF-OprN systems in PA154197.** Substrate profiles of the MexAB-OprM and

794 MexEF-OprN and their preferences are shown schematically based on the MIC alterations (Fig  
795 2 and S2 Table) in the  $\Delta mexB$ ,  $\Delta mexF$ , and  $\Delta mexB \Delta mexF$  cells relative to the WT. The greater  
796 the MIC changes in the single mutant relative to the WT, the stronger substrates they are  
797 denoted. The strength of the substrate preference is expressed by the color key shown, except  
798 for the TMP, CHL and FOF (in grey) which MICs were only changed in the double mutant.  
799

800 **Fig 6. Schematic diagram of the native type I-F CRISPR-Cas mediated genome editing**  
801 **in PA154197 and its exploitations in functional genomics investigation.** Desired mutants  
802 with altered resistance (or virulence, other physiology) can be obtained in one step by  
803 introducing a programmable editing plasmid, which carries a mini-CRISPR (expressing a  
804 crRNA) and a repair donor, into the MDR/XDR PA154197 cells with ready luminescence  
805 selection. The crRNA directs the Cascade complex to the target. Recombination occurs  
806 between the repair donor and the target area to prevent the target interference, resulting in the  
807 desired mutation. Two-step editing can be utilized to obtain mutations in the genetic loci that  
808 cannot be well targeted by CRISPR. The red sequence indicates a resistant determinant (target)  
809 in PA154197. Cells containing the editing plasmid expressing the *lux* genes are shown in green.  
810

## 811 **Supporting information**

812 **S1 Fig. Effect of desired truncation lengths on the efficiency of editing.** (A) Schematic  
813 diagram of the genetic locus of *mexB* and adjacent region. Desired truncation fragments of 50  
814 bp (B1, 74-123), 500 bp (B2, 74-573), 1000 bp (B3, 74-1073), the full length (*mexB*, 1-3141),  
815 and the primers to test these truncations are shown. (B) Positive clones of each of truncations  
816 in eight randomly selected transformants are highlighted in red.

817

818 **S2 Fig. Curing of the editing plasmid in the edited cells.** Edited cells could not grow in the  
819 presence of kanamycin (100 µg/ml) after plasmid curing, which was achieved by culturing the  
820 edited cells without antibiotic pressure overnight.

821

822 **S3 Fig. Harnessing the native type I-F CRISPR-Cas system for genome editing in other *P.***  
823 ***aeruginosa* isolates.** The single editing plasmid pAY5235 was transformed in the clinical *P.*  
824 *aeruginosa* isolate PA150567 and the environmental isolate Ocean-100 to achieve *mexB*  
825 deletion in one-step. Eight randomly selected luminescent transformants were subjected to  
826 colony PCR to screen for the desired  $\Delta$ *mexB* mutants. Positive clones are highlighted in red.  
827 Primers used in colony PCR are indicated in Figure 1B.

828

829 **S4 Fig. Disk diffusion assay of the antibiotic susceptibilities of PA154197 and its isogenic**  
830 **mutants.** Disk diffusion test is conducted to examine the susceptibility of PA154197 and its  
831 isogenic mutants to eight antipseudomonal drugs (A) and four other antibiotics and  
832 antimicrobial agents (B). Larger inhibition zone represents the higher susceptibility to the  
833 indicated antibiotics.

834

835 **S5 Fig. Growth curves of PA154197 and its isogenic mutants in the absence of antibiotics.**

836 No difference of growth among PA154197 and its isogenic mutants were observed.

837

838 **S6 Fig. Depiction of genetic mutations identified in the key antibiotic resistance genes**

839 *mexR*, *mexT* and *GyrA* in PA154197. (A) The point mutation (G226T) in PA154197 *mexR*  
840 gene leads to premature termination of its protein product. (B) An 8-bp deletion in PA154197  
841 *mexT* relative to that in PAO1 converts the out-of-frame *mexT* product to the in-frame, active  
842 form of *mexT* product. (C) PA154197 *gyrA* gene contains a T248C substitution (corresponding  
843 to T83I in the GyrA protein) in the quinolone resistance-determining region (QRDR) and a  
844 <sup>2723</sup>CCGAGT<sup>2728</sup> 6-bp deletion (corresponding to the deletion of E959&S960) in the C terminal  
845 domain of the gene product.

846

847 **S7 Fig. Non-efficient targeting at the desired editing site in the *mexT* gene.** (A) Schematic

848 showing the desired 8-bp insertion (CGGCCAGC) into the *mexT* gene. The 6-bp repeat  
849 sequences (in red) in the target which potentially obscure the targeting by the CRISPR-Cas  
850 apparatus are shown. PAM is shown in frame. (B) No desirable DNA interference was observed  
851 by transforming the *mexT*-targeting plasmid pAY5900 into PA154197 cells in comparison with  
852 the control plasmid pAY5211. Note that no repair donor was provided in this plasmid.

853

854 **S8 Fig. Replacing the essential gene *gyrA* with that from PAO1 using the two-step In-Del**

855 **method.** (A) Schematic showing the two-step strategy for *gyrA* gene replacement. The tag  
856 sequence (in pink) is first introduced downstream of *gyrA* (in orange) between the PAM and  
857 protospacer portions of a selected target (in blue). In the second step, a tag-targeting plasmid  
858 carrying the repair donor (Del-donor) is provided. Del-donor lacks the tag sequence but  
859 contains the *gyrA* gene (in dark blue) from PAO1, which is flanked by two ~1000-bp sequences  
860 upstream and downstream of the PA154197 *gyrA* gene. The primer pairs F/Seq-R and Seq-

861 F/Seq-R were used for the colony PCR analysis in (B) and DNA sequencing, respectively. **(B)**

862 Eight luminescent positive transformants from each editing step were randomly selected for

863 colony PCR analysis. Desired mutants confirmed by DNA sequencing are highlighted in red.

864

865 **S1 Table. A summary of mutational changes in the antibiotic resistance (AR) genes in**

866 **PA154197 by comparative genomic analysis**

867

868 **S2 Table. MICs of various antibiotics in PAO1, PA154197 and its isogenic mutants**

869

870 **S3 Table. Contribution of basal-level, over-produced and overall MexAB-OprM pump to**

871 **the resistance to different antipseudomonal antibiotics in PA154197**

872

873 **S4 Table. Bacterial strains, plasmids used in this study**

874

875 **Fig 1**

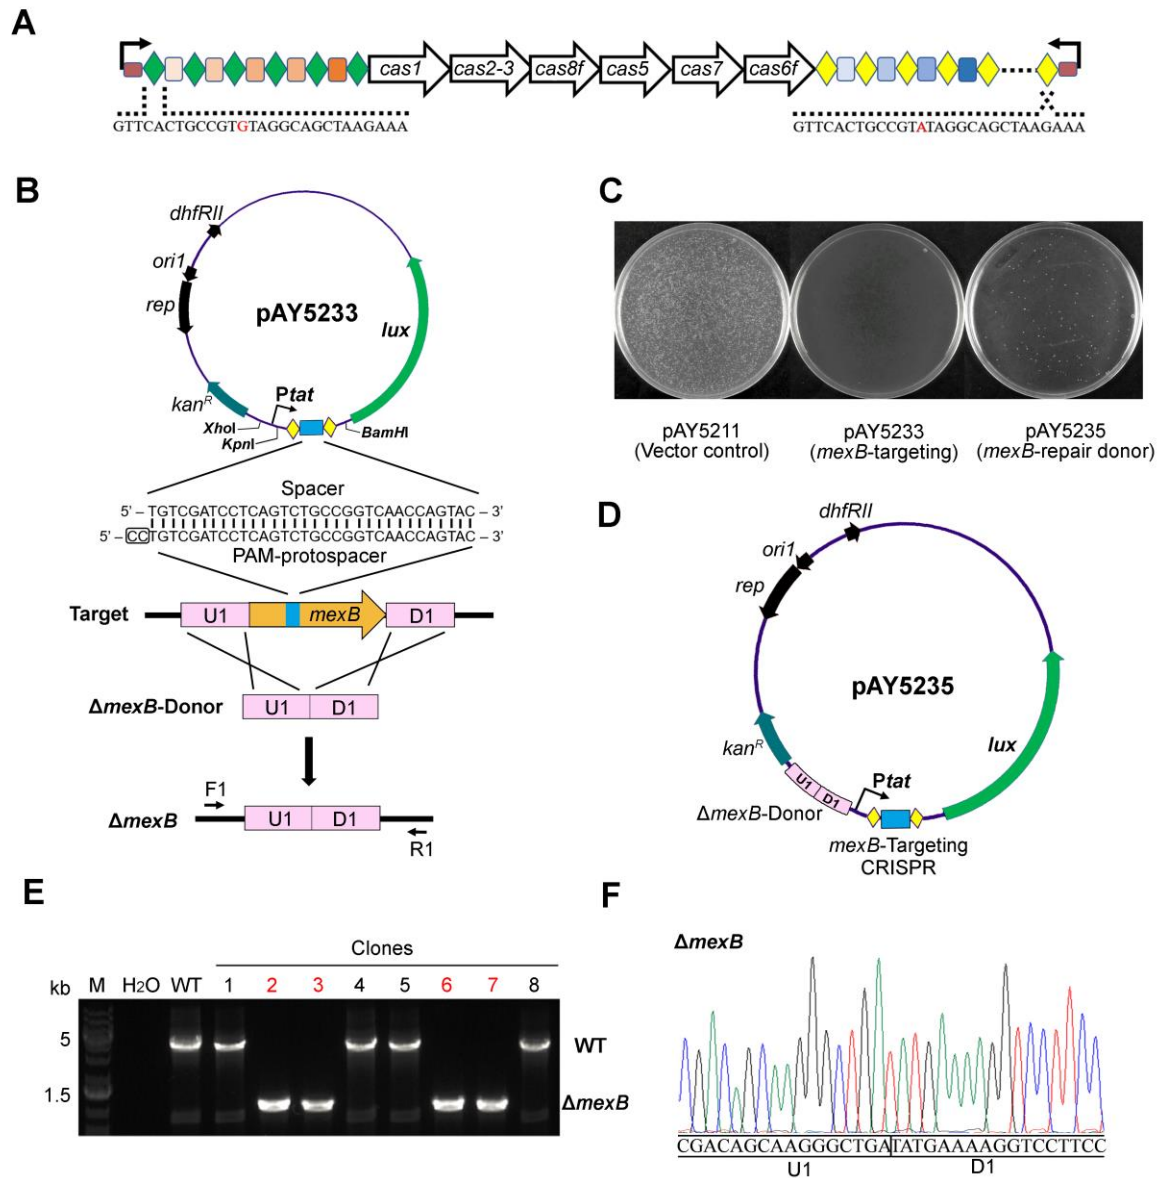

876

877

878 **Fig 2**

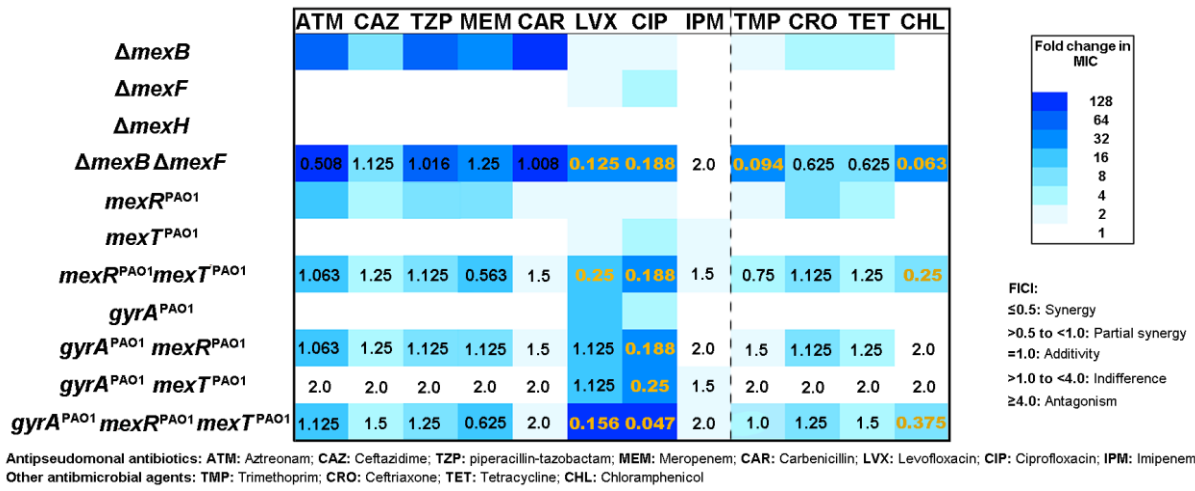

879

880

881 **Fig 3**

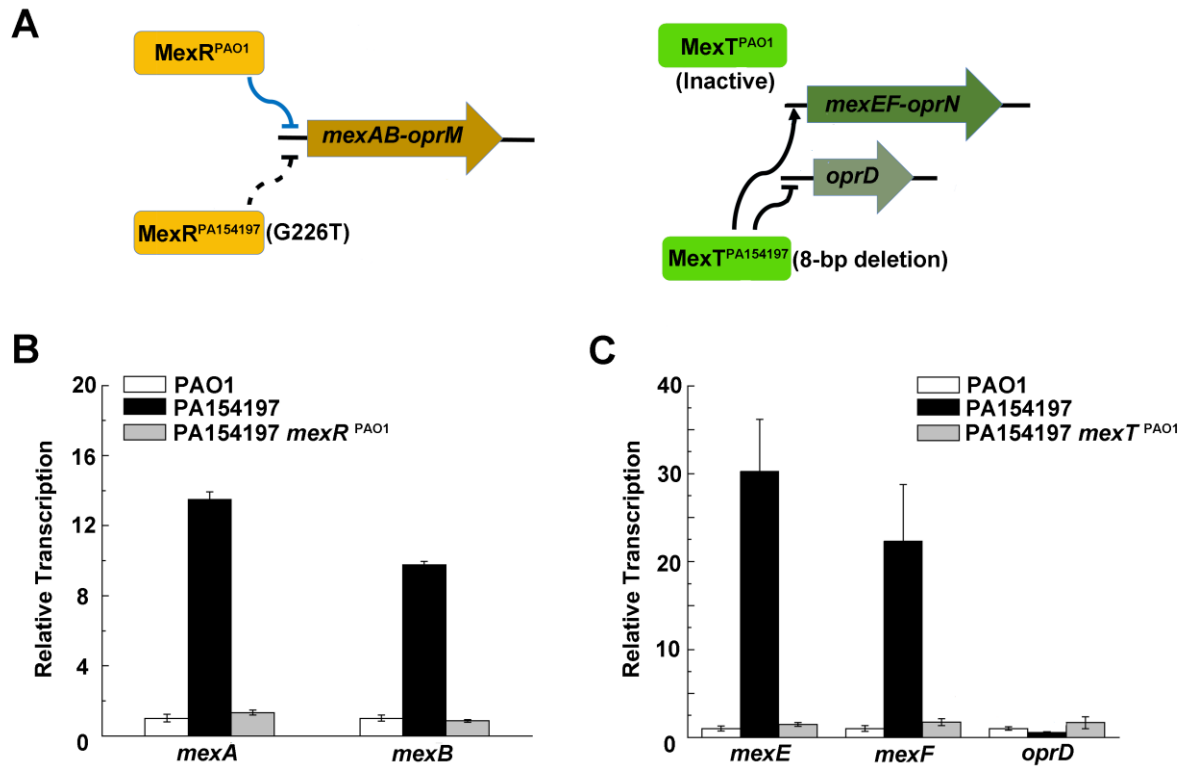

882

883



884 **Fig 4**

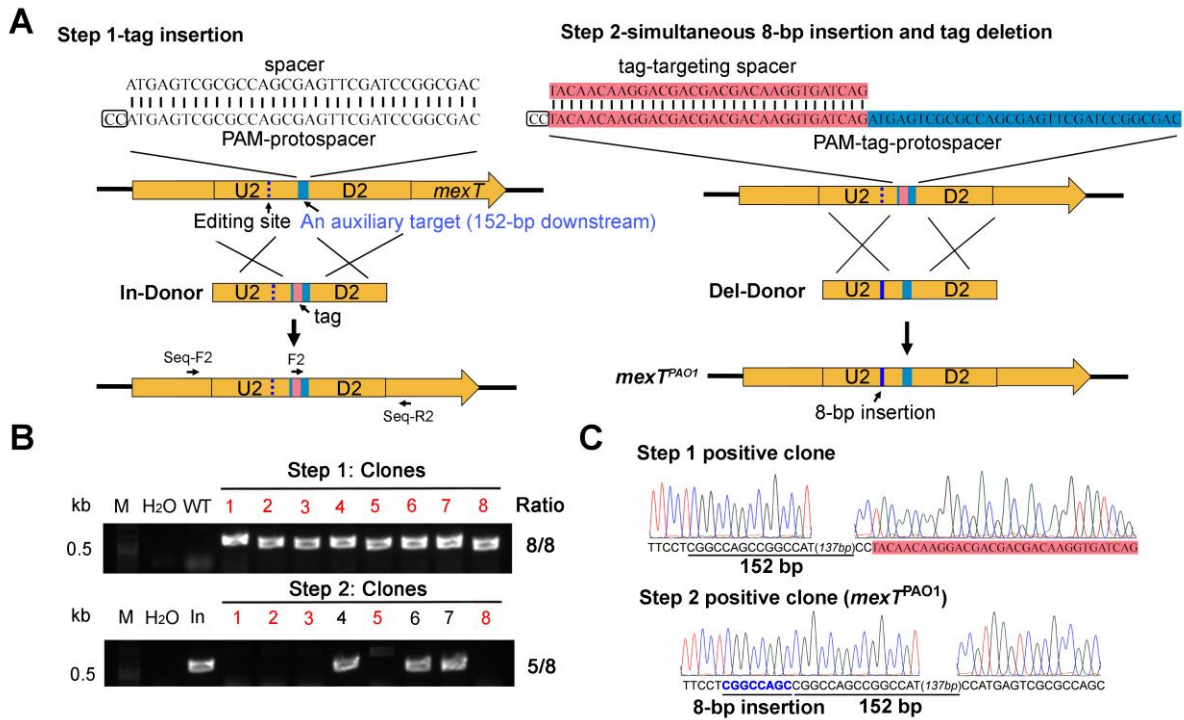

885

886

887 **Fig 5**

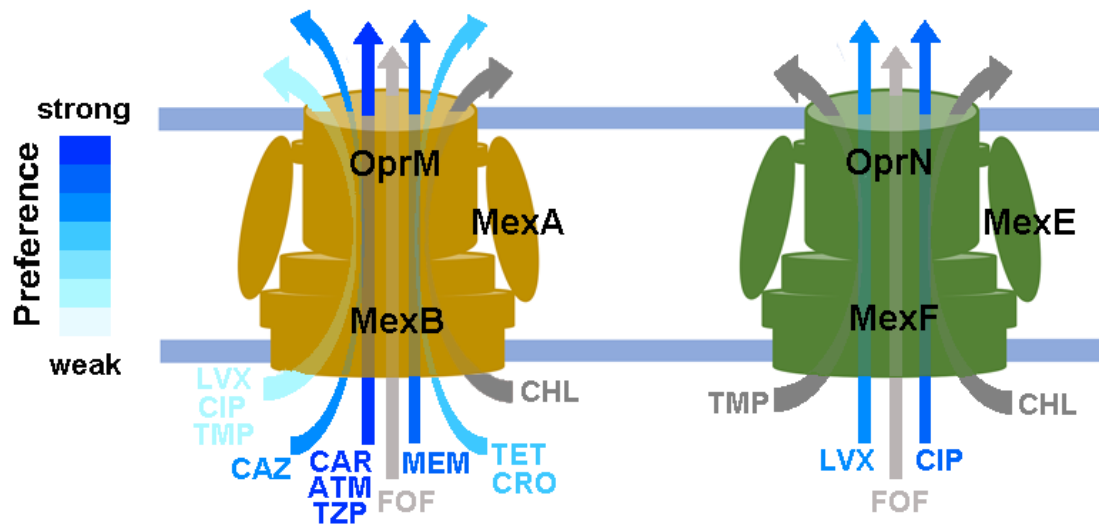

888

889

890 **Fig 6**

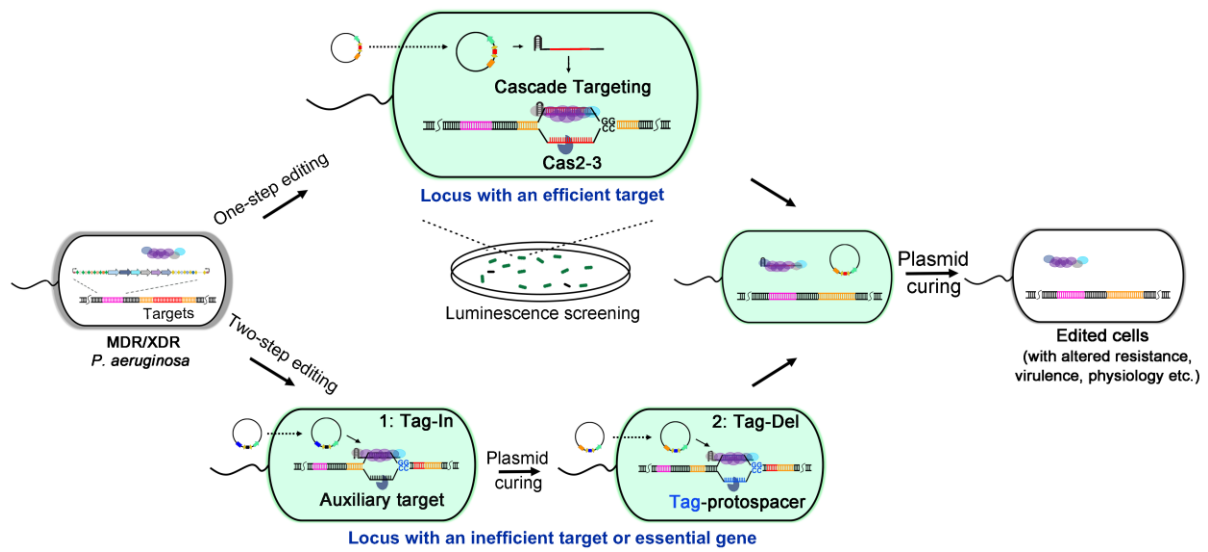

891
